1 **TITLE: Virus-derived variation in diverse human genomes**

2

3 Shohei Kojima, Anselmo Jiro Kamada, Nicholas F. Parrish\*

4

5 Genome Immunobiology RIKEN Hakubi Research Team, RIKEN Center for Integrative Medical  
6 Sciences and RIKEN Cluster for Pioneering Research, Yokohama, Japan 230-0045

7

8 \*corresponding author: [nicholas.parrish@riken.jp](mailto:nicholas.parrish@riken.jp)

9

10

11

12 **Abstract**

13           Acquisition of genetic material from viruses by their hosts can generate inter-host  
14 structural genome variation. We developed computational tools enabling us to study virus-  
15 derived structural variants (SVs) in population-scale whole genome sequencing (WGS) datasets  
16 and applied them to 3,332 humans. Although SVs had already been cataloged in these  
17 subjects, we found previously-overlooked virus-derived SVs. We detected somatic SVs present  
18 in the sequenced lymphoblastoid cell lines (LCLs) derived from squirrel monkey retrovirus  
19 (SMRV), human immunodeficiency virus 1 (HIV-1), and human T lymphotropic virus (HTLV-1);  
20 these variants are attributable to infection of LCLs or their progenitor cells and may impact gene  
21 expression results and the biosafety of experiments using these cells. In addition, we detected  
22 new heritable SVs derived from human herpesvirus 6 (HHV-6) and human endogenous  
23 retrovirus-K (HERV-K). We report the first solo-DR HHV-6 that likely to reflects rearrangement  
24 of a known full-length endogenous HHV-6. We used linkage disequilibrium between single  
25 nucleotide variants (SNVs) and variants in reads that align to HERV-K, which often cannot be  
26 mapped uniquely using conventional short-read sequencing analysis methods, to locate  
27 previously-unknown polymorphic HERV-K loci. Some of these loci are tightly linked to trait-  
28 associated SNVs, some are in complex genome regions inaccessible to prior methods, and  
29 some contain novel HERV-K haplotypes likely derived from gene conversion from an unknown  
30 source or introgression. These tools and results broaden our perspective on the coevolution  
31 between viruses and humans, including ongoing virus-to-human gene transfer contributing to  
32 genetic variation between humans.

33  
34 (241 words)

## 35 Introduction

36 Union of genomes from discrete biological entities is a major engine of genetic diversity.  
37 Fusion of gametes, each bearing a set of recombinant chromosomes, is the immediate source  
38 of the genetic material that uniquely identifies each human. Taking a wider viewpoint, much of  
39 human genome can be recognized to have been acquired from a non-human source. For  
40 example, about 2% of the genome of many living humans can be attributed to introgression  
41 from Neanderthals (1). Movement of genetic information between biological entities apart from  
42 sexual reproduction, known as horizontal gene transfers (HGT), has also occurred in the human  
43 lineage. Some HGT happened so long ago that it is difficult to accurately classify the entity  
44 contributing the horizontally-transferred sequences according to extant taxonomies. This case  
45 for the bacteria, acquired millennia ago, now represented as our mitochondrial genomes. Other  
46 HGT occurred more recently. For example, about 8% of human genetic material is derived from  
47 human endogenous retroviruses (HERV) that integrated into our ancestors' germline and then  
48 developed an intracellular replication cycle; some HERVs integrated recently enough that they  
49 can be classified based on homology to extant exogenous retroviruses.

50 The most recent among these retroviral integrations, of a lysine tRNA-primed HERV (i.e.  
51 HERV-K) subgroup called HML-2, occurred less than a million years ago (2). A single HERV-K  
52 element showing insertional polymorphism in different humans was known at the time of  
53 completion of the draft human genome (3), but during the past 20 years, over 40 insertionally-  
54 polymorphic elements have been described (2, 4–9). In addition to retroviruses, sequences from  
55 ancient relatives of Borna disease virus, an RNA-only virus, were horizontally acquired in the  
56 haplorrhine lineage (10). Human herpesviruses 6A and 6B, double stranded DNA viruses, have  
57 also been horizontally transferred to some human genomes during the holocene (11–13). These  
58 observations show that viruses acquired during the lifespan of an individual organism, including  
59 humans, have sometimes contributed to the genetic material passed on to their offspring,  
60 seemingly in violation of Weismann's proposed barrier between soma and germline (14). When  
61 these viral sequences are acquired, the resulting mutation would be classified as a structural  
62 variant, defined as a DNA rearrangement greater than 50 nucleotides in length. Structural  
63 variants in human genomes are increasingly characterized at population scale (15–17). In these  
64 studies, SVs caused by polymorphic insertion of mobile genetic elements classified as  
65 transposons (including Alu, LINE-1, and SVA) have been considered explicitly. On the other  
66 hand, structural variants derived from viruses, another potentially important class of mobile  
67 genetic elements, have yet to be analyzed comprehensively.

68           Here we designed and applied new tools to comprehensively assess virus-derived  
69 structural variants in short-read genome sequencing data at population scale. We are not the  
70 first to consider viral sequences present in shotgun WGS datasets, however others have done  
71 so under the assumption that viral reads reflect a somatically-acquired “virome,” similar to the  
72 bacterial microbiome (18, 19). To distinguish exogenous virus contamination from germline  
73 integration, we applied several criteria, including read depth relative to autosomal genes and  
74 patterns of linkage disequilibrium with SNVs. Although we used human WGS datasets which  
75 have already been deeply analyzed to establish global SV references (15, 17), we discovered  
76 previously-undescribed heritable SVs derived from virus-origin genetic material. We detect  
77 squirrel monkey retrovirus (SMRV), human immunodeficiency virus 1 (HIV-1), and human T  
78 lymphotropic virus 1 (HTLV-1) in LCLs widely distributed as reference materials for  
79 characterizing human genetic and phenotypic variation, raising both biosafety and  
80 reproducibility concerns. We developed a new approach to detect and map polymorphisms in  
81 HERV-K that allows us to infer polymorphisms at over 60 loci previously unknown to be  
82 polymorphic, including new loci associated with human phenotypes. We show that viruses  
83 contribute unexpectedly to human genome structural variation and describe new tools for  
84 analyzing these variants at increasing scales.

85

86

## 87 Results

### 88 *Detection of virus-mapped reads from diverse human populations*

89 To discover human structural variation derived from viral sequences, we analyzed WGS  
90 reads that failed to map to the reference human genome (GRCh38DH). We used 3,332 high-  
91 coverage WGS datasets from the 1,000 Genomes Project (1kGP) and the Human Genome  
92 Diversity Project (HGDP) (20, 21), all derived from lymphoblastoid cell lines (LCLs). Unmapped  
93 reads were re-mapped to reference virus genomes from NCBI (see methods). We focused on  
94 viruses with abundantly-mapped reads, requiring that 5% of a viral genome be covered at more  
95 than 2x read depth. Applying this filter, we detected 7 high-coverage viruses (Figure 1,  
96 Supplementary Figure 1). Next we checked the patterns of viral genome coverage using the  
97 plots automatically generated as an output from our tool. We detected reads mapping to Chum  
98 salmon reovirus in 2 datasets from individuals of South Asian ancestry; only the first 200-bp of  
99 the viral genome was covered by reads, which were abundant in these two datasets but absent  
100 in others (Supplementary Figure 2). We detected reads mapping to simian T-lymphotropic virus  
101 1 (STLV-1) in 4 samples. STLV-1-mapped reads were only detected in the datasets in which  
102 HTLV-1-mapped reads were also found (see below), and the same reads mapped to both  
103 HTLV-1 and STLV-1 (Supplementary Figure 2). In contrast, reads from SMRV, HIV-1, HTLV-1,  
104 human herpesvirus 6A (HHV-6A) and human herpesvirus 6B (HHV-6B) were abundantly  
105 detected in at least one subject, potentially consistent with presence in the germline, and reads  
106 covered the entire viral genome.  
107

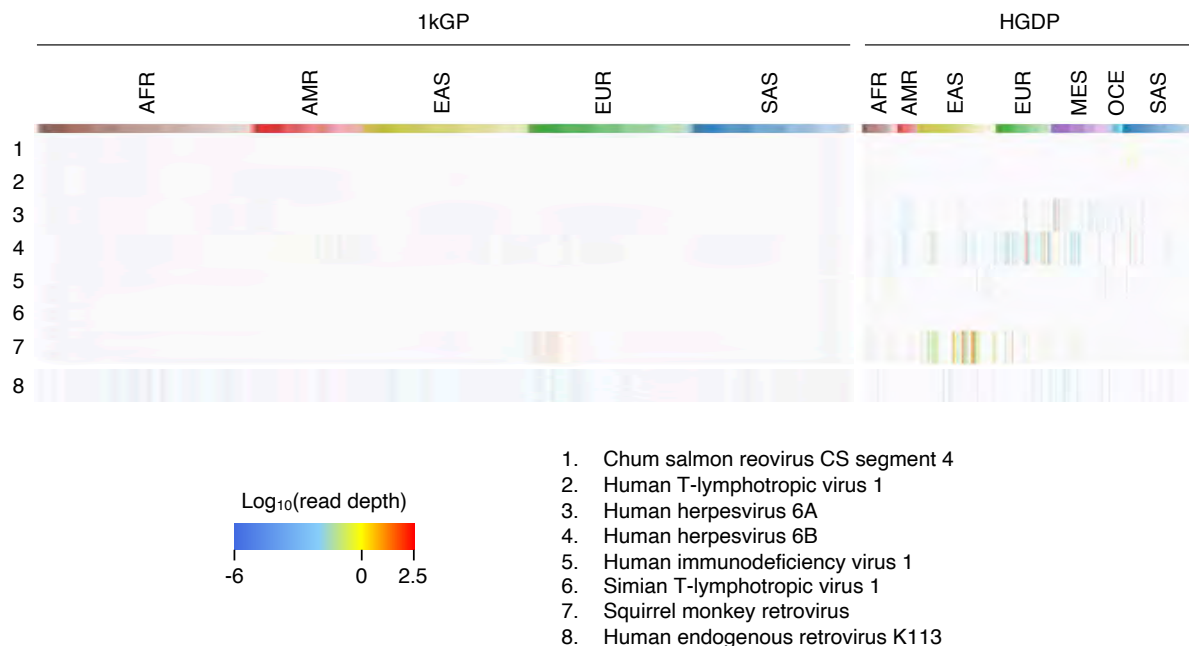

108

109 **Figure 1** Virus search from 3,332 WGS.

110 Heatmap shows read depth of seven viruses with abundant reads in at least one dataset and HERV-K113. The  
111 column colors show the human populations in the two databases. See Supplementary Figure 1 for the details of the  
112 names of the indicated populations. (1kGP: 1,000 Genomes Project; HGDP: Human Genome Diversity Project; AFR:  
113 African; AMR: American; EAS: East Asian; EUR: European; SAS: South Asian).

114

115

116 *Squirrel monkey retrovirus*

117 SMRV-mapped reads were abundantly detected in 18 datasets, with a wide range of  
118 SMRV-mapped read depths in datasets from different subjects (Figure 2A, Supplementary  
119 Figure 3). From the 1kGP, all 12 datasets with SMRV were from subjects from Utah, including 2  
120 subjects with read depths greater than 1x autosomal depth. All reads lack a guanosine in the  
121 tRNA primer binding site (PBS) relative to SMRV-H, which was isolated from macaque cell-  
122 derived preparations of Epstein Barr virus (EBV) (22); the tRNA PBS of the SMRV detected  
123 here is identical to SMRV sequences recently obtained from Vero cells (23), a cell line used for  
124 biologicals production (Figure 2A) (24). To determine if SMRV was integrated into the genomes  
125 of the sequenced LCLs, we searched for paired reads with one read mapped to the virus  
126 genome and one pair to the human genome (i.e. hybrid reads). Virus-human hybrid reads were  
127 observed, often mapped to the SMRV long terminal repeat (LTR), consistent with the virus  
128 being integrated into human chromosomes (Figure 2B); the human-mapped reads of these  
129 hybrid pairs mapped to multiple chromosomal loci (Figure 2C, Supplementary Figure 4). We  
130 found no enriched integration sites consistent with a clonal integration in the germline, nor  
131 shared integration sites across different subjects. These observations suggest these SMRV  
132 integrations are somatic rather than present in the germline. To assess whether the SMRV  
133 integrations occurred before or after the peripheral blood mononuclear cells (PBMCs) used to  
134 produce LCLs were removed from these subjects, we analyzed sequencing results obtained  
135 directly from these subject's nucleated blood cells (25, 26). No reads mapped to SMRV. The  
136 most plausible source of SMRV in the sequenced cell lines is thus laboratory contamination (22,  
137 27). This observation notwithstanding, SMRV requires biosafety level 2 (BSL2) containment,  
138 and the adventitious presence of SMRV in these samples could influence other results using  
139 these reference materials. We obtained LCLs from 2 subjects from whom high SMRV reads  
140 were found and confirmed the presence of SMRV DNA by PCR (Fig 2D). We analyzed existing  
141 RNAseq data (28) and confirmed that SMRV is transcribed and is associated with differential  
142 gene expression relative to LCLs in which SMRV RNA is not detected (Supplementary Figure  
143 5).

144

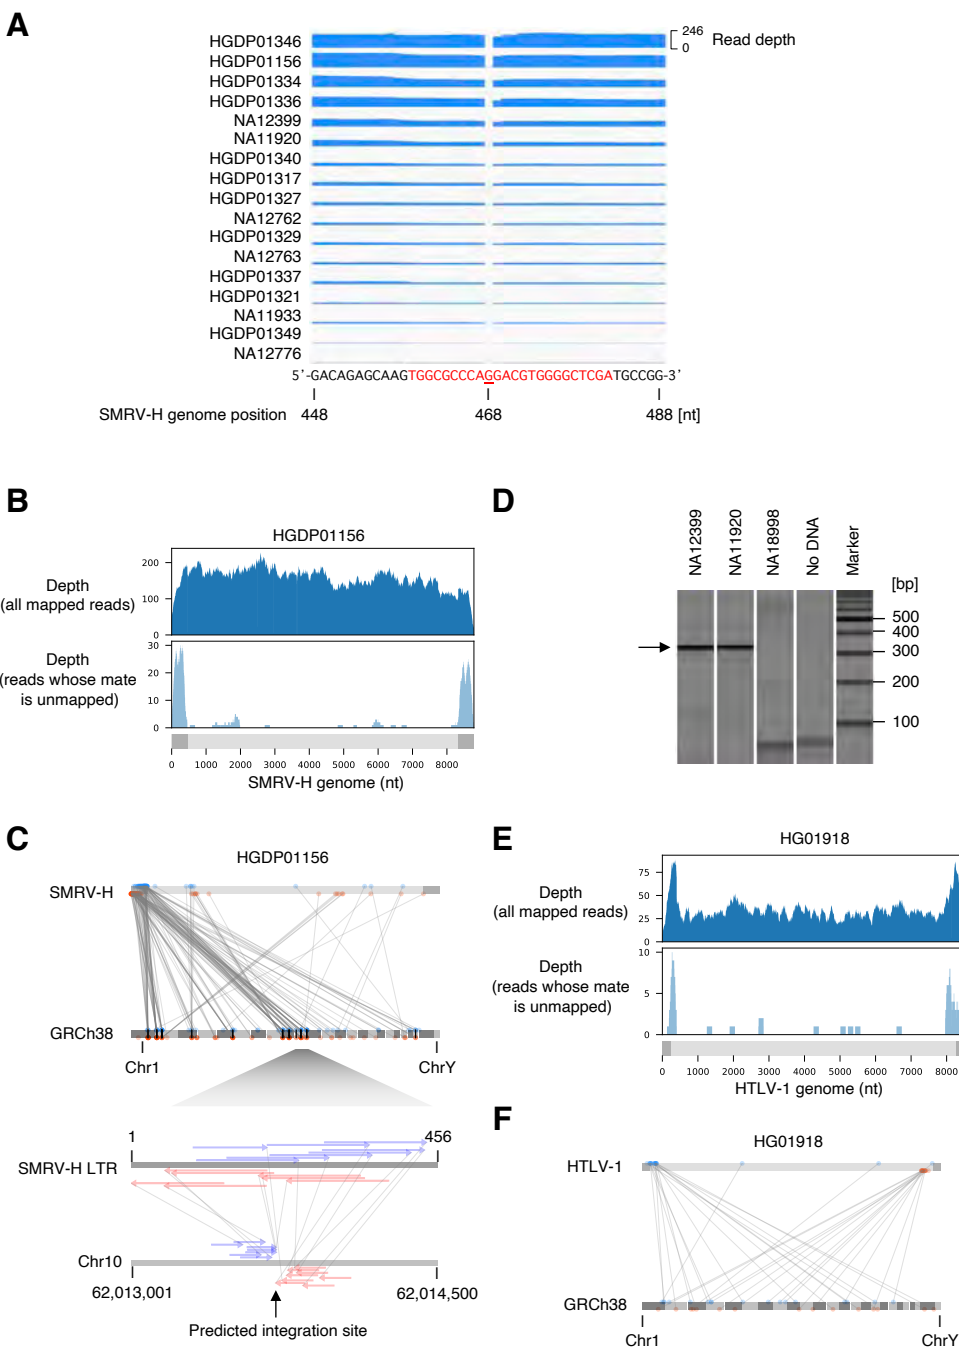

**Figure 2** Chromosomal integrations of SMRV and HTLV-1

- 145  
146  
147  
148  
149  
150  
151  
152  
153  
154  
155  
156
- Depth of WGS reads mapping to the primer binding site (PBS) of the SMRV-H genome. Seventeen datasets with at least one read mapping to PBS are shown. One dataset did not have any read mapping to PBS. The PBS of SMRV-H is shown with red characters. In all WGS datasets, the SMRV reads lack the guanine present at the 468th nucleotide of the SMRV-H genome.
  - Depth of HGDP01156 reads mapping to SMRV-H. Upper panel shows the depth of all reads in the dataset mapping to the SMRV-H genome. Lower panel shows the depth of reads mapping to the SMRV-H genome whose mate is not mapped to the SMRV-H genome. Virus genome structure is shown as gray bars. LTR are shown as dark gray rectangles.
  - Mapping positions of SMRV-chromosome hybrid reads. Read-1 and Read-2 of a read-pair are connected with a line. All LTR-mapped reads are shown on the left LTR. The lower panel shows the predicted SMRV

- 157 integration site on chromosome 10. Gray bar in the top of the upper panel represents the virus genome  
158 structure. Dark gray rectangles represent LTR. Reads mapping to the forward and reverse directions are  
159 shown as blue and red arrows, respectively.
- 160 D. Detection of SMRV DNA from 1kGP LCLs by PCR. Genomic DNA extracted from the indicated LCLs were  
161 used as templates for PCR. WGS datasets from NA12399 and NA11920 are positive for SMRV, while that of  
162 NA18998 is negative.
- 163 E. Depth of HG01918 reads mapping to HTLV-1. Upper panel shows the depth of all reads in the dataset  
164 mapping to HTLV-1. Lower panel shows the depth of reads whose pair is not mapped to the HTLV-1  
165 genome.
- 166 F. Mapping positions of HTLV-1-chromosome hybrid reads. Read-1 and Read-2 of a read-pair are connected  
167 with a line. The reads mapping to left LTR was kept when a read was multi-mapped to both left and right  
168 LTR. The genome position of reads mapping only to right LTR were replaced to the left LTR.

169

170

### 171 *Human immunodeficiency virus 1 and human T-lymphotropic virus 1*

172 We detected reads mapping to HIV-1, whose primary targets in the peripheral blood are  
173 T lineage cells, in 8 datasets with a maximum coverage of the viral genome 8.5% and depth  
174 0.29x, inconsistent with germline integration (Supplementary Figure 2). LCLs are generated by  
175 infecting PBMCs with EBV, which infects mature B cells. Accordingly, most LCL B cell receptors  
176 (BCR) have undergone V(D)J recombination, the signature of mature B cells. Moreover, the  
177 mode of BCR clonality in a subset of the LCLs analyzed here is one; i.e. they are monoclonal  
178 (29). Expression of a rearranged T cell receptor, consistent with presence of T lineage cells,  
179 was observed in only one LCL among over 450 screened. HIV-1-mapped reads thus likely  
180 either result from infection of hematopoietic progenitor cells (30), ongoing infection of LCLs (31),  
181 or from contamination. We did not attempt to confirm the presence of infectious HIV-1 from  
182 these cell lines.

183 Like HIV-1, HTLV-1 is a known human pathogen endemic in populations studied here.  
184 HTLV-1 is often transmitted perinatally; analyzing WGS is thus an opportunity to distinguish  
185 somatic vertical transmission from potential occult germline horizontal transfer of HTLV-1. Five  
186 datasets showed HTLV-1 reads, with read depths ranging from 0.03x (a single paired-end read)  
187 to 1.1x relative to autosomes. Two datasets contained HTLV-1-mapping reads at a depth  
188 potentially consistent with heritable integrations, 0.55x and 1.1x respectively. Using the hybrid  
189 reads approach described above, we demonstrated multiple integrations (Figure 2E, F,  
190 Supplementary Figure 4), arguing against germline-inherited integration as the cause of the high  
191 abundance of HTLV-1-mapped reads in these datasets. Like HIV-1, HTLV-1 is not well known to  
192 infect and integrate into B cells, the source of most LCLs. Thus integration of HTLV-1 into  
193 hematopoietic progenitor cells and maintenance of integration site diversity through the LCL  
194 generation process, or ongoing replication of HTLV-1 in LCLs, may explain these findings.



195 Subjects whose LCLs sequencing datasets suggest presence of SMRV, HIV-1, and HTLV-1  
 196 are listed in Supplementary Table 1.

197

198 *Human herpesvirus 6*

199 Germline-integrated HHV-6 has been reported in some of the same datasets analyzed  
 200 here (32), however we recently described another form of integrated HHV-6 in which a single  
 201 HHV-6 direct repeat (DR) is present (termed “solo-DR”). The solo-DR form presumably reflects  
 202 recombination between the two DR regions present in the full-length integrated HHV-6 genome  
 203 leading to excision of the unique portion of the viral genome (12). Abundant HHV-6 reads were  
 204 present in 18 datasets (Table 1, Figure 3A, Supplementary Figure 6), suggesting that these  
 205 subjects likely have chromosomally-integrated copies of HHV-6. One of these samples  
 206 contained reads mapped only to the DR region of HHV-6B, characteristic of the solo-DR form of  
 207 integrated HHV-6.

208

209 **Table 1** Summary of integrated HHV-6 identified from 1kGP and HGDP

| Database    | Sample    | HHV-6  | Structure | Population    | Reference             |
|-------------|-----------|--------|-----------|---------------|-----------------------|
| 1kGP phase3 | HG00245   | HHV-6B | Full      | GBR/EUR       | Telford <i>et al.</i> |
| 1kGP phase3 | HG00362   | HHV-6B | Full      | FIN/EUR       | Telford <i>et al.</i> |
| 1kGP phase3 | HG01058   | HHV-6B | Full      | PUR/AMR       | Telford <i>et al.</i> |
| 1kGP phase3 | HG01162   | HHV-6B | Full      | PUR/AMR       | Telford <i>et al.</i> |
| 1kGP phase3 | HG02016   | HHV-6B | Full      | KHV/EAS       | Telford <i>et al.</i> |
| 1kGP phase3 | HG02301   | HHV-6B | Full      | PEL/AMR       | Telford <i>et al.</i> |
| 1kGP phase3 | HG00145   | HHV-6B | Solo-DR   | GBR/EUR       | This study            |
| 1kGP phase3 | HG00657   | HHV-6A | Full      | CHS/EAS       | Telford <i>et al.</i> |
| 1kGP phase3 | HG01277   | HHV-6A | Full      | CLM/AMR       | Telford <i>et al.</i> |
| 1kGP phase3 | NA18999   | HHV-6A | Full      | JPT/EAS       | Zhang <i>et al.</i>   |
| 1kGP pilot  | NA19381   | HHV-6B | Full      | LWK/AFR       | Telford <i>et al.</i> |
| 1kGP pilot  | NA19382   | HHV-6B | Full      | LWK/AFR       | Telford <i>et al.</i> |
| HGDP        | HGDP00092 | HHV-6B | Full      | Balochi/SAS   | Zhang <i>et al.</i>   |
| HGDP        | HGDP00614 | HHV-6A | Full      | Bedouin/MES   | This study            |
| HGDP        | HGDP00628 | HHV-6A | Full      | Bedouin/MES   | This study            |
| HGDP        | HGDP00800 | HHV-6B | Full      | Orcadian/EUR  | This study            |
| HGDP        | HGDP00802 | HHV-6B | Full      | Orcadian/EUR  | This study            |
| HGDP        | HGDP00813 | HHV-6B | Full      | Han/EAS       | Zhang <i>et al.</i>   |
| HGDP        | HGDP01065 | HHV-6B | Full      | Sardinian/EUR | Zhang <i>et al.</i>   |
| HGDP        | HGDP01077 | HHV-6B | Full      | Sardinian/EUR | Zhang <i>et al.</i>   |

210

211

212

213 To understand the origin of these integrated HHV-6 variants, we analyzed their  
 214 relationship to previously-reported exogenous and integrated HHV-6 sequences. All  
 215 reconstructed sequences clustered with previously-reported sequences (Figure 3B,  
 216 Supplementary Figure 8, 9). Two endogenous HHV-6A found in Bedouin subjects clustered with  
 217 clade A2 sequences, which were previously found in subjects in the US and UK, suggesting  
 218 these subjects share endogenous HHV-6A derived from a single integration event. Shared

219 ancestry of this chromosomal fragment, previously shown to correspond to the telomere of  
220 chromosome 17p, between subjects on three continents is consistent with the deep evolutionary  
221 relationship of endogenous HHV-6A (13). Newly-reported endogenous HHV-6B in two subjects  
222 in HGDP were grouped with clade B8 and Clade B3, respectively. Clade B8 integrations also  
223 map to chromosome 17p, which bears a short telomere (33). The integration site of clade B3  
224 endogenous HHV-6 has not yet been determined.

225         To clarify the origin of the newly-detected solo-DR variant, we generated a phylogenetic  
226 tree using only DR sequences (Figure 3C, Supplementary Figure 10). The solo-DR form  
227 reconstructed from the HG00145 genome was present in the same clade as DRs from clade B4  
228 and B8 full-length endogenous HHV-6B. This suggests that the solo-DR form likely arose from  
229 an HHV-6B source closely related to that of clade B4 and B8, but precludes confident inference  
230 that the solo-DR represents a germline rearrangement of a full-length endogenous HHV-6.  
231 Detection of solo-DR integrated HHV-6 in this already well-characterized dataset shows that  
232 screening WGS databases may provide additional information regarding the excision and  
233 potential for reactivation of endogenous HHV-6.

234  
235

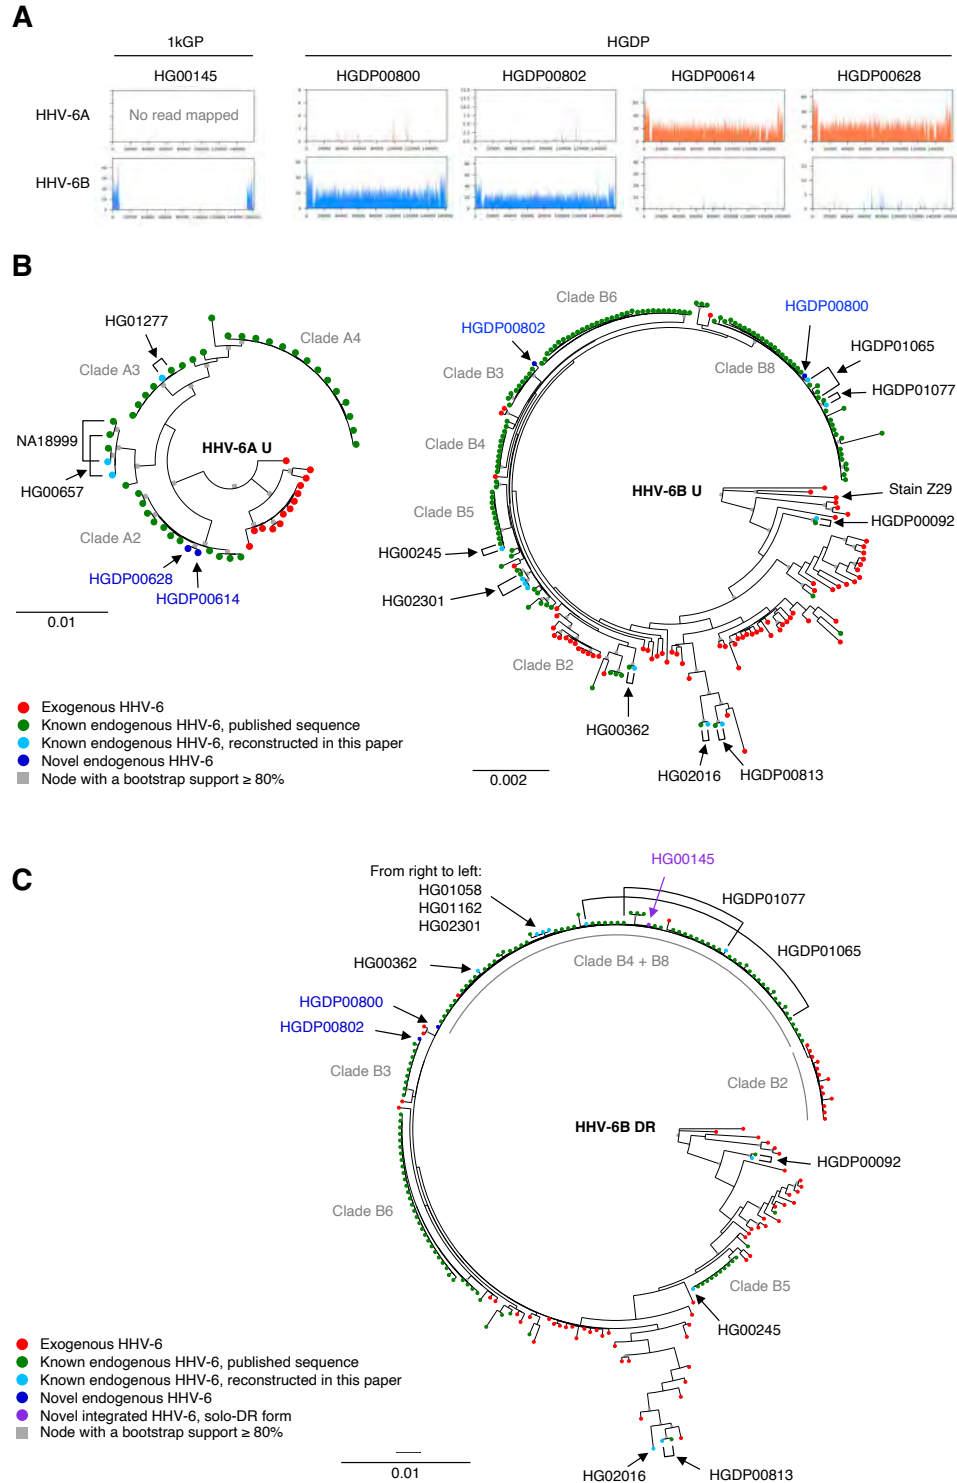

236  
237  
238  
239  
240  
241  
242  
243

**Figure 3** Detection and phylogenetic analysis of endogenous HHV-6.

- A. Depth of reads mapping to HHV-6 in the 5 WGS datasets from 1kGP and HGDP.  
B. Phylogenetic trees inferred from U regions of HHV-6A and B. The publicly available sequences of endogenous and exogenous HHV-6 as well as ones reconstructed in the present study were used.  
C. Phylogenetic tree inferred from DR regions of HHV-6B. The publicly available sequences of endogenous and exogenous HHV-6B, as well as ones reconstructed in the present study, were used. B, C. Clade names defined in the phylogenetic analysis in Aswad *et al.* are shown.

244

245

246 *Human endogenous retrovirus K*

247

248

249

250

251

252

253

254

255

256

257

258

259

260

261

262

263

264

265

266

267

268

269

270

271

272

273

274

275

276

277

Previous studies of the DNA virome detectable from human genome sequencing datasets have noted inter-individual variation in reads mapped to HERV-K (18, 19). This variation (e.g. Figure 1) has been speculated to result from polymorphic HERV-K integrations (19). While the viruses described above are absent from reference human genomes, HERV-K is present in multiple nearly-identical copies in reference genomes. This makes detecting additional non-reference integrations and mapping the chromosomal location of polymorphisms challenging. Previous advances in mapping HERV-K polymorphisms have been made by local breakpoint reconstruction using read-pairs that span insertion junctions (2). Taking a different approach to this problem, we extracted all unique  $k$ -mers of length 50 from the aligned portion of reads mapped to the HERV-K113 provirus (i.e. excluding the LTRs, Figure 4A). To filter only those  $k$ -mers derived from HERV-K loci that are polymorphic between humans, we extracted  $k$ -mers which were absent in at least one subject and present in at least two subjects ( $n=37,845$  “presence-absence type”  $k$ -mers). Hierarchical clustering of presence/absence-type  $k$ -mer occurrences recapitulates the continental human population supergroups (Figure 4B), as does clustering based on the allele frequency of previously reported polymorphic HERV-K in human subpopulations (2). This suggested that presence-absence  $k$ -mers may be a suitable proxy to allow for discovery of additional polymorphic HERV-K alleles.

We hypothesized that structurally-polymorphic HERV-K alleles generate multiple unique  $k$ -mers with the same pattern of presence or absence in multiple subjects. To test this, we generated an all-by-all Pearson correlation coefficient matrix for presence/absence type  $k$ -mers which were detected in more than 50 subjects ( $n=8,642$ ) then performed hierarchical clustering of  $k$ -mers. This revealed multiple groups of  $k$ -mers with presence/absence patterns that were highly correlated with one other (Figure 4C), suggesting that a single polymorphic HERV-K locus could generate multiple presence/absence-type  $k$ -mers. We formally defined clusters using DBSCAN (see methods), resulting in 597 clusters of highly co-associated  $k$ -mers.

We next investigated how the observed clusters of presence/absence-type  $k$ -mers relate to known HERV-K polymorphisms. Some  $k$ -mer clusters correspond very well with those of known HERV-K polymorphisms previously described in these same subjects (Figure 4D). For example, the presence/absence pattern of  $k$ -mers in cluster282 is highly correlated with that of a non-reference HERV-K insertion on chr19. This suggests that in some cases, clusters of presence/absence-type  $k$ -mers reflect HERV-K polymorphisms.

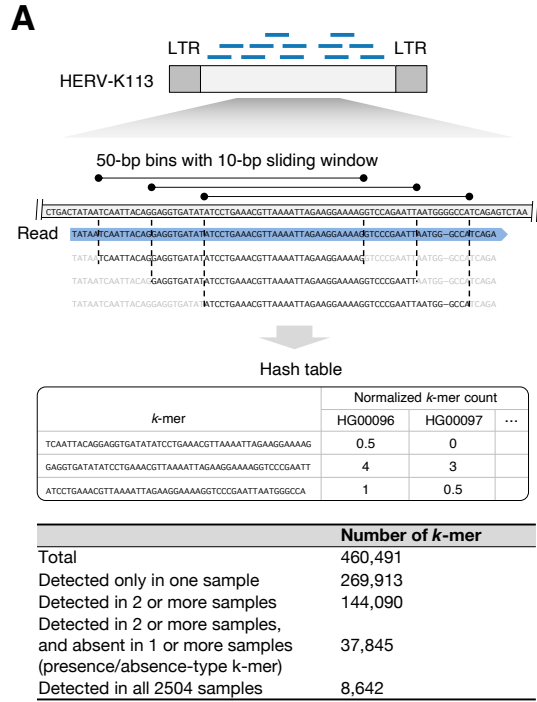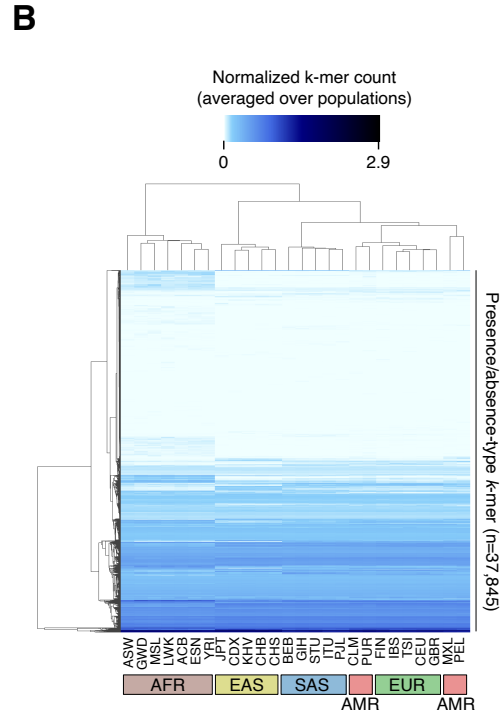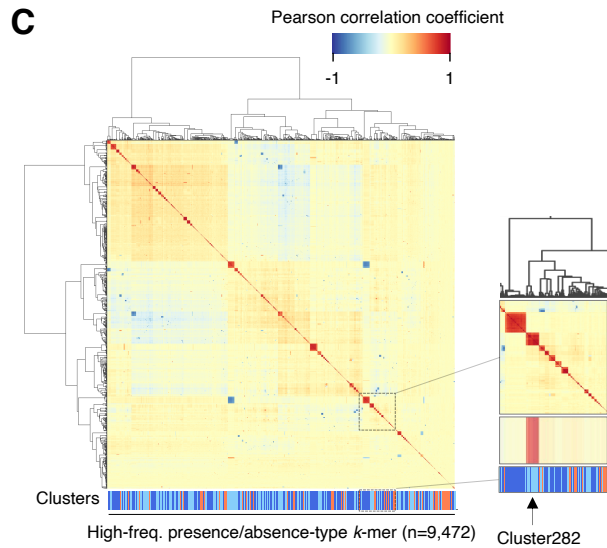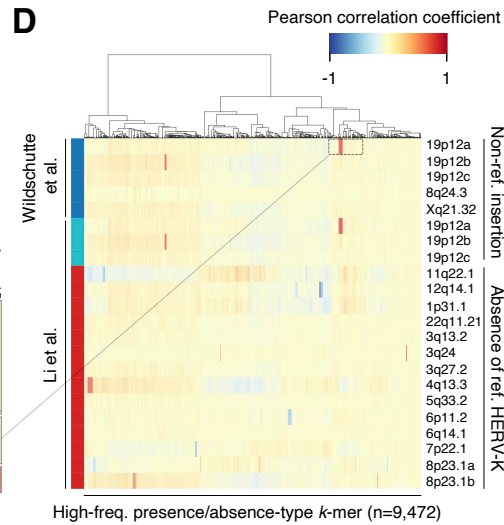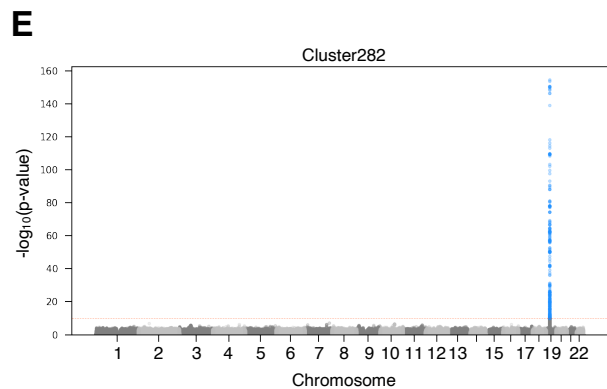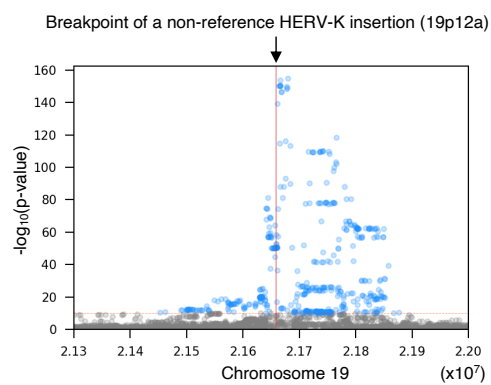

- 279 **Figure 4** HERV-K *k*-mer detection from 1,000 Genomes Project WGS  
280 A. Schematic representation of *k*-mer counting from WGS reads mapping to HERV-K113. The HERV-K113  
281 genome was split into 50-bp bins with a 10-bp sliding window, then, sequences of the mapped reads  
282 corresponding to the HERV-K 50-bp bins were listed. The lower table shows the number of *k*-mers detected  
283 from 2,504 WGS datasets from the 1,000 Genomes Project.  
284 B. Hierarchical clustering of *k*-mers based on their frequencies in 26 populations. Heatmap shows the normalized  
285 *k*-mer count averaged over populations.  
286 C. Clustering of presence-absence type *k*-mers by Pearson correlation coefficient. Clustering were performed by  
287 Ward's method (upper heatmap) and DBSCAN (lower color-bar). The heatmap shows the Pearson correlation  
288 coefficient between *k*-mers, and the lower color-bar shows the clusters. Neighboring *k*-mer clusters are shown  
289 as either dark or light blue. Orange represents the *k*-mers which were not clustered.  
290 D. Correlation between the occurrence of HERV-K *k*-mers and previously reported HERV-K polymorphisms.  
291 Heatmap shows the Pearson correlation coefficient between the presence of *k*-mers and polymorphic HERV-K  
292 reported in the two previous studies. (C, D) Insets in the panel C and D shows that the occurrence of *k*-mers in  
293 cluster282 have high correlation to the presence of known polymorphic HERV-K in 19p12a.  
294 E. GWA using occurrence of *k*-mers detects known polymorphic HERV-K. Manhattan plots show SNVs with  
295 association to the occurrence of *k*-mers in the cluster282. SNVs with p-value lower than  $8.33e-11$  are shown as  
296 blue dots. Red solid line in the right panel shows the position of known non-reference HERV-K.

297  
298  
299 Determining where on the chromosome a particular polymorphic repetitive genetic  
300 element is located can be challenging using short read sequencing data, because the read  
301 evincing a polymorphism could potentially have arisen from a number of loci bearing nearly  
302 identical elements. In addition, while some reads mapping to HERV-K LTRs are paired with  
303 uniquely-mappable reads from flanking non-repeat DNA, variant reads mapping to the HERV-K  
304 provirus are rarely paired with uniquely-mappable non-repetitive reads, as a consequence of the  
305 size of most sequencing library inserts. To overcome these challenges, we took advantage of  
306 the linkage disequilibrium (LD) structure of human chromosomes. We hypothesized that a *bona*  
307 *fide* polymorphic HERV-K element, giving rise to a *k*-mer cluster, would be in linkage  
308 disequilibrium with nearby SNVs. If so, analyzing genome-wide association (GWA) with SNVs  
309 would allow us to locate the polymorphic HERV-K. To validate whether this approach is able to  
310 accurately report the genome positions of polymorphic HERV-K, we examined a known non-  
311 reference HERV-K insertion. GWA analysis using the presence/absence-pattern of cluster282 *k*-  
312 mers, considered as a binary trait, detected a significant association with a single approximately  
313 300-kb region on chromosome 19 known to contain the non-reference HERV-K insertion (Figure  
314 4E). This approach of using linkage disequilibrium to find repetitive element differences, an  
315 approach which may be applicable to other repetitive elements, is abbreviated here as "LDfred."

316 We performed GWA analyses using the presence/absence patterns of all 597 clusters.  
317 As a result, 503 clusters detected at least one genome region with a Bonferroni-corrected  
318 genome-wide significant association; clusters with associated regions tended to consist of more  
319 *k*-mers and/or be present in more subjects (Supplementary Figure 11). We merged clusters that

320 were associated with overlapping regions (see methods), resulting in a total of 79 HERV-K *k*-  
 321 mer-associated loci spanning a total of 74.7 Mb. These loci most often include regions in which  
 322 the *P* values peak sharply, pinpointing the most tightly-linked LD block and narrowing the  
 323 presumed location of the HERV-K variant (e.g. Figure 4E). Consistent with previous work  
 324 showing that mobile elements are often linked to trait-associated SNVs (34, 35), the SNVs  
 325 comprising these HERV-K polymorphism-associated haplotypes are associated with numerous  
 326 human traits (Supplemental Table 2), including 5 loci in which SNVs from the GWAS catalog  
 327 (36) overlap precisely with the genomic regions evincing polymorphic HERV-K (Supplemental  
 328 Figure 12). To check whether these new *k*-mer-associated loci indeed contain polymorphic  
 329 HERV-K, we evaluated overlap with known polymorphic HERV-K loci (2, 4–6). Seven out of 10  
 330 known non-reference proviruses are present within the observed loci (2 known non-reference  
 331 proviruses are not on the reference autosomes included for GWA), as are all 16 reference  
 332 HERV-K known to be absent in some subjects (Figure 5).

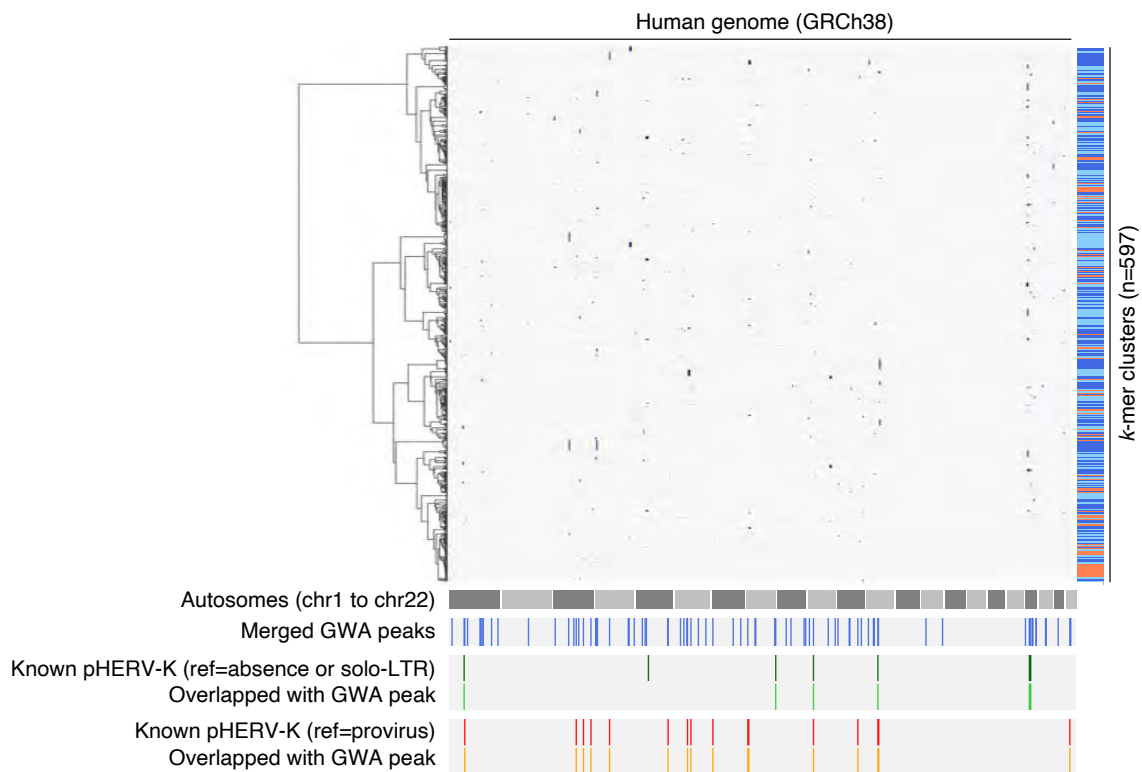

333 **Figure 5** Genome positions associated with HERV-K *k*-mers  
 334 The blue dots in the left clustermap show the genome positions with association to *k*-mer clusters by GWA analysis.  
 335 The blue lines in the third right column show the 79 genome loci associated with *k*-mer clusters. The dark green lines  
 336 show the 8 known non-reference HERV-K on autosomes. The light green lines show the 7 *k*-mer cluster-associating  
 337 genome loci overlapping with the known non-reference polymorphic HERV-K on autosomes. The dark orange lines  
 338 show the 16 known reference polymorphic HERV-K on autosomes. The light orange lines show the 16 *k*-mer cluster-  
 339 associating genome loci overlapping with the known reference absent HERV-K on autosomes.

341

342 To assess whether LDfred could localize previously unknown polymorphisms, we  
343 checked long-read sequencing datasets for reference HERV-K that are absent in some  
344 subjects. We filtered an extensive catalog of SVs in three subjects, generated using multiple  
345 sequencing technologies, for deletions that overlap with HERV-K (37). We found 24 reference  
346 HERV-K elements with evidence of full or partial absence in at least one of the three subjects  
347 (Supplementary Table 3). These 24 SVs spanned from 72 to 9,468-bp. We checked if these  
348 HERV-K SVs were present in loci associated with *k*-mer clusters, and whether the  
349 presence/absence pattern of the *k*-mers in each cluster was consistent with the  
350 presence/absence of SV in the three subjects (see methods). Of the 24 HERV-K SVs, 9 were  
351 concordantly detected (Supplementary Table 4); concordantly detected SVs tended to be longer  
352 than those not concordantly detected. Notably, 4 out of 9 detected HERV-K SVs have not been  
353 previously reported as polymorphic HERV-K. These 4 unreported SVs are attributable to  
354 recombination between LTRs (Supplementary Figure 13), which is particularly difficult to find  
355 using existing algorithms and short-read sequencing. This demonstrated that LDfred can  
356 localize unknown HERV-K provirus polymorphisms, including provirus/solo-LTR polymorphisms.

357 SVs in complex or duplicated genome regions are also difficult to identify using short-  
358 read data and available methods (38). To check the utility of our approach for this purpose, we  
359 focused on HERV-K loci at chromosome ends, known to be complex genome regions (39). One  
360 locus, associated with cluster352, is in the subtelomeric region of the short arm of chromosome  
361 4. There are no HERV-K proviruses in this region, however there are 2 solo-LTRs, suggesting  
362 the possibility of a provirus/solo-LTR polymorphism, or an additional non-reference HERV-K  
363 insertion. We assessed whether either of these reference LTR loci sometimes contain a provirus  
364 using long read sequencing data from a trio (40). WGS from the father and child contained  
365 cluster352 *k*-mers, but the mother did not harbor any *k*-mers in cluster 352, suggesting that the  
366 father and child could carry a non-reference provirus. We inspected reads mapped to the  
367 subtelomere of chromosome 4 and found a read containing non-reference provirus at the region  
368 corresponding to one of the solo-LTRs in the reference genome at this locus (Figure 6). Thus  
369 LDfred can detect provirus/solo-LTR polymorphic HERV-K loci in complex regions including  
370 subtelomeres.

371



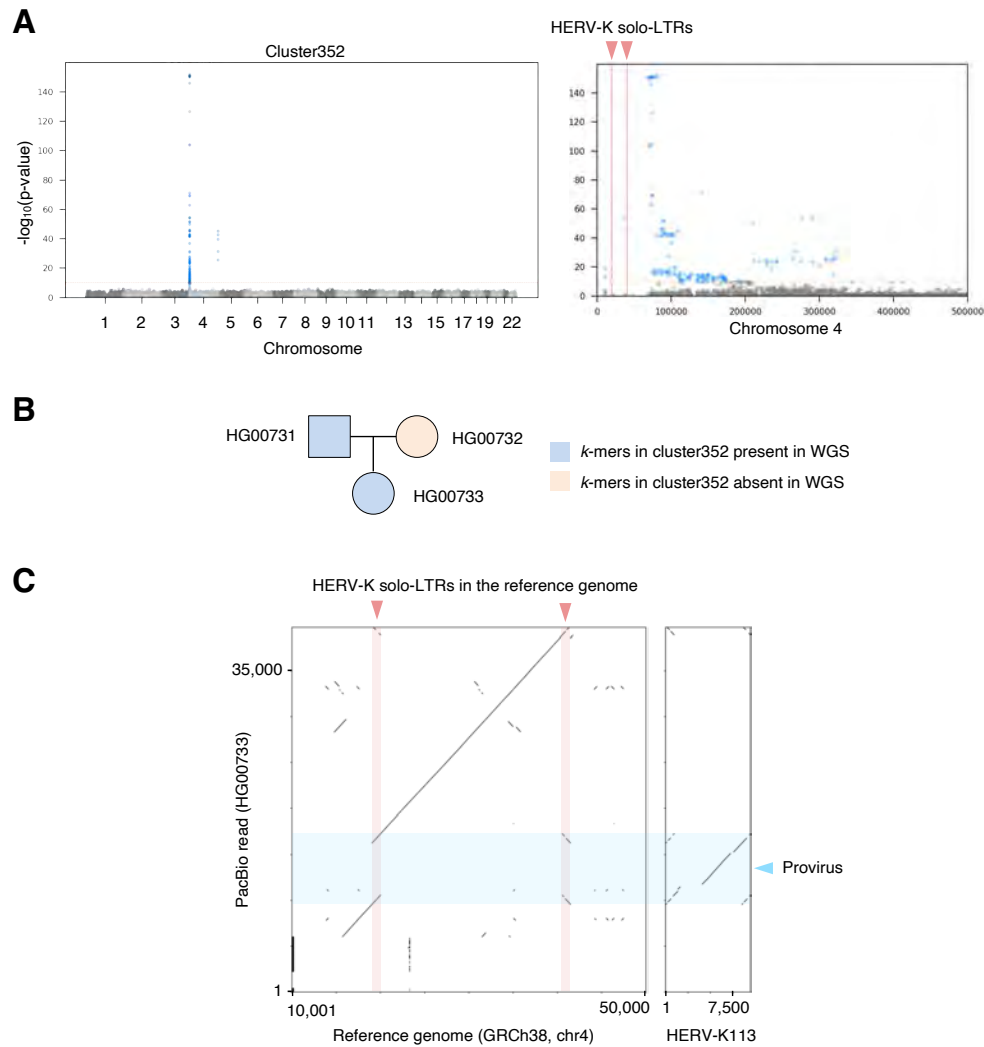

372  
373  
374  
375  
376  
377  
378  
379  
380  
381  
382  
383  
384

**Figure 6** *K*-mer-based method detects previously-unreported HERV-K polymorphism in subtelomere

- A. SNVs associating with *k*-mers in cluster352. The right panel shows the region near the end of the p-arm of the chromosome 4. SNVs with p-value lower than  $8.33\text{e-}11$  are shown as blue dots. The red solid lines in the right panel show two reference HERV-K solo-LTR in the subtelomere region.
- B. Presence and absence of *k*-mers of cluster352 in the public high-coverage short-read WGS of the Chinese trio.
- C. HG00733 contains non-reference provirus. Left panel shows the dot matrix between the reference human genome and a PacBio read of HG00733. The right panel shows the dot matrix between the reference HERV-K113 and the PacBio reads of HG00733. Light blue and light red rectangles represent HERV-K provirus and solo-LTR, respectively.

385 Of the 79 loci identified here, five loci contain known non-reference presence/absence or  
386 provirus/solo-LTR polymorphisms and 14 contain reference HERV-K known to be absent in  
387 some subjects (including some merged loci containing more than one polymorphism). Six loci  
388 reflect provirus/solo-LTR polymorphisms that have not been previously reported, but which are  
389 readily demonstrated in long-read data (Figure 6, Supplementary Figure 13, 14). The remaining  
loci cannot be assessed using available long-read data, because the minor variants, as

390 determined by *k*-mer pattern, are not present in subjects with available data. To determine the  
391 polymorphisms giving rise to the signal that allowed us to identify the remaining loci, we chose  
392 three for which the regions flanking reference HERV-K in these regions allowed us to design  
393 specific primers. Targeted long-read sequencing revealed differences in the HERV-K at these  
394 loci consistent with the *k*-mer pattern differences between the individuals. The nature of the  
395 variation at these loci was not structural; instead, it consisted of multiple SNVs (up to 11) linked  
396 in a haplotype (Figure 7; Supplementary Figure 15, 16). This high degree of linked SNV  
397 variation distinguishing HERV-K proviruses at the same locus is unexpected due to accrual of  
398 substitutions; 11 mutations across these 4.9 kilobases of the HERV-K provirus (Figure 7) would  
399 accumulate over 4.4 million years (41), and the linkage between them would be expected to be  
400 degraded by crossover recombination events during that period. Instead, this more likely reflects  
401 interlocus gene conversion via recombination, which has previously been described for HERV  
402 on the basis of comparison of LTRs in different species (42), or introgression. Notably, the  
403 specific HERV-K haplotypes present as minor variants in these loci are not detected by BLASTn  
404 search of the hg38 reference genome. Thus LDfred can localize previously-uncharacterized  
405 sources of non-structural HERV-K variation.

406

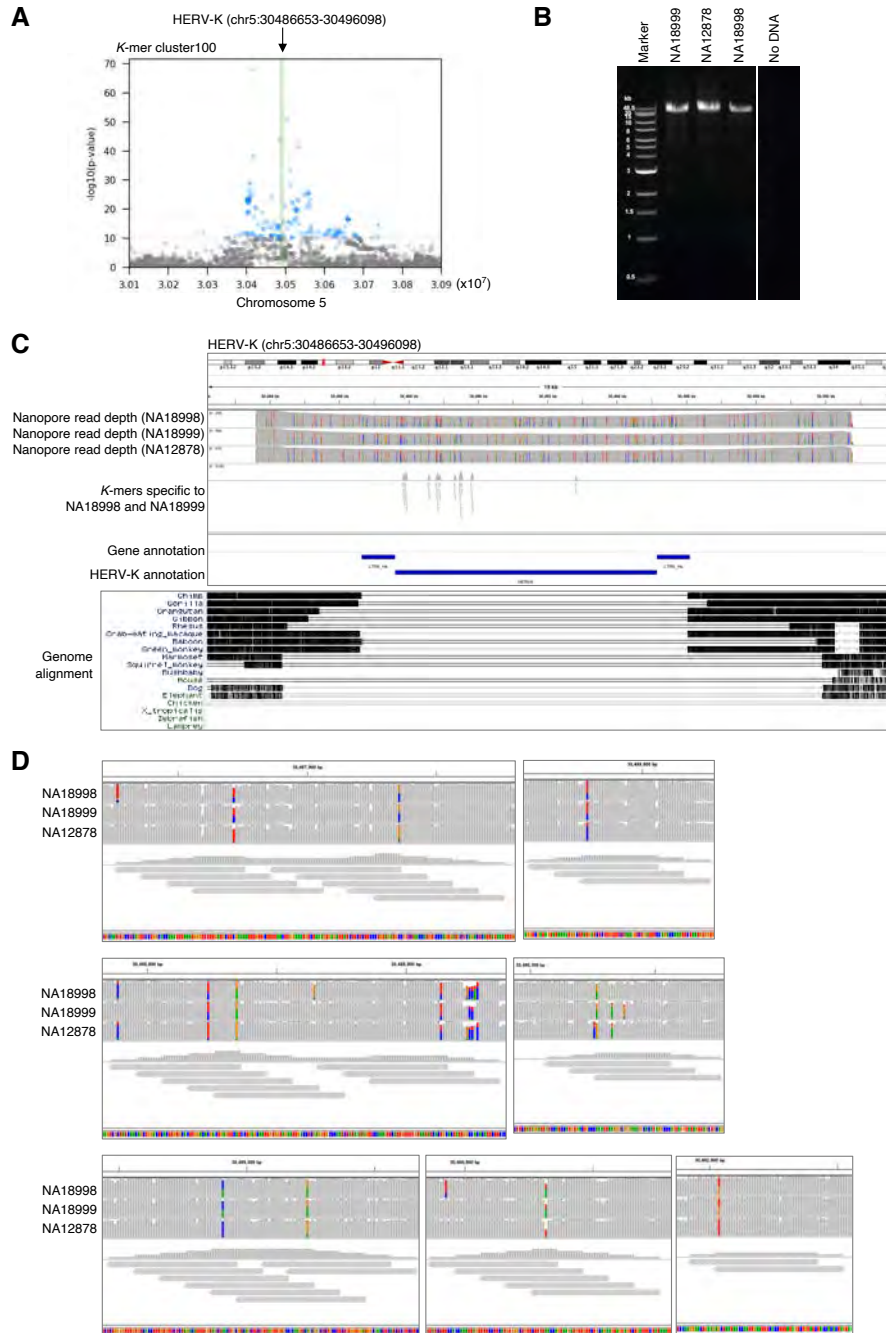

407  
408  
409  
410  
411  
412  
413  
414  
415  
416  
417  
418  
419

**Figure 7** Potential interlocus gene conversion in HERV-K localized by LDfred

- A. Manhattan plot showing SNVs associating the *k*-mer cluster100. SNVs with p-value lower than  $8.33e-11$  are shown as blue dots. Green line shows the reference HERV-K provirus.
- B. Amplification of the HERV-K provirus by PCR. HERV-K provirus with adjacent sequence was amplified and PCR products were separated by gel electrophoresis. DNA extracted from LCLs originating from NA18998, NA18999, and NA12878 were used as templates.
- C. Upper panel: IGV view of long-read sequencing reads mapping to HERV-K. The PCR amplicons were sequenced using an Oxford Nanopore flongle flow cell and mapped to GRCh38. *k*-mers in *k*-mer detecting the HERV-K were also mapped to the PCR target regions. Lower panel: UCSC genome browser view showing the Multiz Alignment of 100 Vertebrates track.
- D. Enlarged images of panel C. NA12878 carries two alleles of a non-reference HERV-K haplotype (which is not observed elsewhere in the reference genome) also present as a single allele in NA18998 and NA18999.

## 420 Discussion

421 This work provides a comprehensive picture of virus-derived structural variations in two  
422 well-studied global WGS datasets. We found previously-missed germline structural variants  
423 arising from HHV-6 and HERV-K, as well as virus integration in somatic cells due to natural  
424 infection or contamination. The presence of SMRV integrations in LCLs introduces caveats in  
425 analyzing these materials and the data derived from them. This is especially notable for cells  
426 used in the 1kGP, from which only subjects from Utah (collected by CEPH) are SMRV-positive.  
427 In most subjects, the number of virus-chromosome hybrid reads detected at each specific  
428 genome locus is low, suggesting a mosaic of cells with different integration events. However, in  
429 some datasets, such as HGDP01156 and HGDP01346, a substantial number of hybrid reads  
430 are detected from individual genome loci, suggesting a high fraction of clonal cells bearing the  
431 same virus integration event. In such cases, the SMRV insertion could influence nearby variant  
432 calls, and could also influence clonal expansion during the course of LCL culture (43). SMRV is  
433 transcribed in SMRV-positive LCLs, and this viral RNA could influence host transcription, for  
434 example by triggering innate immune pattern recognition receptors. However, we observed no  
435 significant change in expression of interferon-stimulated genes (ISGs). This may be related to  
436 the concurrent presence of EBV, reported to counteract ISGs, in these cells (44). SMRV-  
437 positive LCLs did express a few genes significantly differently than SMRV-negative cells, which  
438 has implications for interpreting the results of studies using these cells and datasets (28). We  
439 confirmed the presence of SMRV DNA in recently-distributed LCLs from these donors. While  
440 biosafety regulations vary by locality, our results reinforce that even well-characterized LCLs  
441 should be handled as potential sources of infectious viruses.

442 We found evidence of infection of LCL progenitors with HIV-1 or HTLV-1. This was  
443 unexpected because B cells, the proximal progenitor of most LCLs, are not efficiently infected  
444 by either of these viruses. However EBV transformation has recently been shown to permit  
445 replication of some types of HIV-1 in B cells (31). Given the diversity of integration sites  
446 observed, we suspect that a similar phenomenon may explain the presence of HTLV-1 in LCLs,  
447 although we cannot exclude somatic mosaicism due to infection of hematopoietic stem cells  
448 (45). We found no evidence of germline structural variants related to HIV-1 or HTLV-1. As has  
449 recently been noted, HIV-1 is capable of infecting germ cells (46). Our result should be  
450 interpreted to indicate that the plausible upper bounds of the global allele frequency of such  
451 variants is ~0.01%; larger-scale projects, or projects sequencing populations with higher  
452 prevalence of infection by these viruses, could apply the methods used here to discover these  
453 rare variants, if they exist.

454 An endogenous form of Koala retrovirus has been considered a unique opportunity to  
455 study a virus that is in the process of endogenization in mammals (47). Our report clarifies the  
456 extent to which humans also harbor a virus that straddles the endogenous/exogenous divide,  
457 HHV-6. Understanding the relationship between endogenous and exogenous HHV-6 is a critical  
458 question to which the tools presented here can be usefully applied. The solo-DR form of  
459 integrated HHV-6B is present in one 1kGP dataset, but was not detected in previous surveys of  
460 these data and samples (32). The presence of unreported solo-DR integrated HHV-6 in such a  
461 well-investigated database suggests that the prevalence and diversity of integrated HHV-6 has  
462 likely been underestimated in other studies as well. Phylogenetic analysis suggests that this  
463 solo-DR variant was potentially formed by partial excision of B4 or B8 clade endogenous HHV-  
464 6B by recombination, leaving behind one DR as a “scar.” This molecular event has been  
465 proposed to lead to viral reactivation. In that context, it is notable that a few reportedly-  
466 exogenous HHV-6B sequences are quite closely related to B4 and B8 endogenous HHV-6B,  
467 while the majority of sampled exogenous HHV-6B are more divergent. We cannot exclude the  
468 possibility that this solo-DR variant is related to a third independent integration by a virus related  
469 to those giving rise to B4 and B8 endogenous HHV-6B. Furthermore, while the DR was  
470 evidently present in a hemizygous state in the nuclei of LCLs from this subject, there is no  
471 evidence that it is endogenous or “inherited” as is often used to describe such variants; we  
472 consider it most accurate to describe it as chromosomally-integrated HHV-6 until another  
473 identical-by-descent variant should happen to be observed, integrated in another human’s  
474 genome.

475 We recently reported the presence of the solo-DR form of endogenous HHV-6 in the  
476 Japanese population. The solo-DR positive subject in 1kGP is of European ancestry,  
477 demonstrating that solo-DR variants are present in populations of different ancestry. Integrated  
478 HHV-6 has been associated with angina pectoris and pre-eclampsia, and in both cases a virus-  
479 dependent mechanism has been postulated (48, 49). It is thus important to ask whether the  
480 solo-DR form of endogenous HHV-6, or only full length HHV-6 integration, is associated with  
481 human phenotypes and diseases. Screening additional databases using the tools developed  
482 here can capture the complete diversity of HHV-6 integration in human chromosomes, leading  
483 to a deeper understanding of its potential influence on human diseases. We also found four  
484 previously unreported full-length endogenous HHV-6. Among these are independent  
485 integrations, one HHV-6A and one HHV-6B, into chromosome 17p, which is reported to carry  
486 the shortest telomere of the 46 chromosome arms (33). This mirrors our observation in the  
487 Japanese population, in which two prevalent endogenous HHV-6 variants, one HHV-6A and one

488 HHV-6B, are integrated on chromosome 22q, which carries the second shortest telomere, on  
489 average (33). One full-length endogenous HHV-6B falls within Clade B3, the integration site of  
490 which is currently unknown, but will be able to be mapped using this LCL in the future.

491 We also explored the polymorphisms of HERV-K, which includes the most recently  
492 integrated HERVs. The overlap of GWA peaks with genome loci known to harbor polymorphic  
493 HERV-K suggests that our approach captures HERV-K polymorphisms that can be discovered  
494 by other methods. In addition, our approach identifies regions with association to HERV-K *k*-  
495 mers that were not previously reported to be polymorphic; these loci likely contain unreported  
496 HERV-K polymorphisms. Using long-read sequencing data, we confirmed that six of these loci  
497 indeed contain HERV-K structural variants. The *k*-mer-based method presented here does not  
498 explicitly distinguish presence/absence-type polymorphisms from SNV polymorphisms in the  
499 non-LTR portion of HERV-K. *K*-mer signals due to individual substitutions, as would begin to  
500 accumulate after integration of a full length HERV-K provirus at a given locus, may also be  
501 detected. This approach conceptually allows finding any sequence differences between repeat  
502 element loci, and may be useful for other difficult-to-map repeat elements (38, 50). In total we  
503 document the nature of the HERV-K polymorphisms explaining over 20 of the loci reported here,  
504 yet many loci remain to be validated; increasing use of long-read sequencing should enable this  
505 soon (51).

506 We set a threshold of clustering only presence/absence type *k*-mers found in at least 50  
507 subjects, so HERV-K polymorphisms with allele frequencies below 0.02 should not be detected.  
508 While we set this threshold arbitrarily and conservatively, this approach is limited in its ability to  
509 localize very rare polymorphisms due to the nature of linkage disequilibrium and the decreased  
510 statistical power of association testing using few polymorphism-bearing subjects. We treated *k*-  
511 mer presence-absence pattern as a binary trait, yet retaining the continuous variation in these  
512 patterns could approximate genotyping, potentially improving localization of polymorphisms in  
513 repeats in the future. Previous studies reported that the majority of unfixed HERV-K in humans  
514 are solo-LTR type (2). We defined *k*-mers using only reads mapped to the non-LTR regions of  
515 HERV-K due to the high sequence similarity between HERV-K LTR and SVA retrotransposons.  
516 This enabled us to detect new solo-LTR vs full provirus polymorphisms, but we could not detect  
517 solo-LTR vs empty site polymorphisms. To understand polymorphisms of HERV-K  
518 comprehensively, including presence/absence of solo-LTR, we will need to expand the *k*-mer-  
519 based method; this will cross-detect SVA retrotransposons which are not virus-derived in this  
520 same sense as the other variants considered within the scope of this report.

521           We used targeted long read sequencing to determine the HERV-K polymorphisms  
522 present within several of the newly-identified loci. We observed divergent HERV-K haplotypes,  
523 differing by 11 linked SNVs within 4,932 bp from the major allele in the most divergent, present  
524 at the same locus. This degree of variation at a syntenic HERV-K integration site, absent in  
525 other great ape genomes, is unexpected as a result of clock-like accumulation of mutations (52).  
526 Among the potential explanations for this phenomenon, two are plausible and warrant  
527 discussion. First, a process of non-allelic homologous recombination, most often referred to as  
528 gene conversion in this context, could exchange the HERV-K haplotype at the locus *en bloc*  
529 with that from another locus. This has often been invoked to explain differences between HERV  
530 loci syntenic between species (42), and has been reported for HERV-K (53). However, the  
531 potential “source” haplotype for such a recombination could not be identified in the hg38  
532 reference genome (i.e. by BLASTn search using the variant *k*-mers). We thus cannot distinguish  
533 whether the source HERV-K element was itself an insertion that has now been lost or fixed as a  
534 solo-LTR, nor can we exclude the possibility of introgression of the HERV-K haplotypes from an  
535 archaic source. In any case these results point to a previously unexplored cache of HERV-K  
536 diversity in human genomes, and offer a new tool to guide its exploration. Considering that  
537 infectious HERV-K sequences can be generated with via recombination between known HERV-  
538 K elements (54), these previously hidden HERV-K polymorphisms are particularly relevant to  
539 study in relation to human phenotypes. Ongoing and future large-scale population sequencing  
540 projects will massively expand the data available to address viral contributions to human  
541 genomes, and the tools presented here will enable integration of these analyses into the  
542 planned output of these consortia (55).  
543  
544  
545

## 546 **Methods**

547

### 548 *WGS datasets*

549 High-coverage WGS datasets from 1kGP were downloaded from the following URL:  
550 'ftp://ftp.1000genomes.ebi.ac.uk/vol1/ftp/data\_collections/1000G\_2504\_high\_coverage/'. High-  
551 coverage WGS datasets from 1kGP Han Chinese trio were downloaded from the following URL:  
552 'https://www.internationalgenome.org/data-portal/data-collection/structural-variation'. High-  
553 coverage WGS dataset from HGDP were downloaded from the following URL:  
554 'ftp://ftp.1000genomes.ebi.ac.uk/vol1/ftp/data\_collections/HGDP/data/'. The utilization of the  
555 high-coverage WGS of multigenerational CEPH/Utah families (phs001872) are authorized by  
556 the National Human Genome Research Institute through dbGaP for the following project: "The  
557 prevalence, evolution, and health effects of polymorphic endogenous viral elements in human  
558 populations."

559

### 560 *Preparation of reference virus genomes*

561 Reference virus genomes were downloaded from NCBI on April-6-2020. We  
562 downloaded three files named  
563 'ftp://ftp.ncbi.nlm.nih.gov/refseq/release/viral/viral.[1,2,3].1.genomic.fna.gz'. These three files  
564 contained 12,182 virus genomes, including phages. These files were concatenated into one file  
565 and used as reference virus genomes for further analysis.

566

### 567 *Virus detection and reconstruction from WGS*

568 Reads that did not map to the reference human genome were extracted from WGS  
569 BAM or CRAM files using `samtools view -f 1 -F 3842 | samtools view -f 12 -F 3328 -`  
570 command. Then, the unmapped reads were converted to FASTQ format using samtools fastq  
571 command. FASTQ reads shorter than 20-nt were removed using a custom Python script and  
572 excluded from downstream analysis. Retrieved sequences were then mapped to the reference  
573 virus genomes using Hisat2 with `--mp 2,1 --no-spliced-alignment` options. After mapping, reads  
574 estimated to be PCR duplicates were marked using picard MarkDuplicates command. Then, the  
575 mapping depth and coverage of each virus was calculated using deeptools bamCoverage  
576 command with `--binSize 1` option. Based on the depth and coverage, we searched for viruses  
577 with abundant reads using a custom Python script. We labeled 'virus\_exist' if 5% of a viral  
578 genome was covered at more than 2x read depth. Virus genomes with a 'virus\_exist' label were  
579 then reconstructed by incorporating variations to the reference virus genomes. To reconstruct  
580 viruses, variations in the reads mapping to virus genomes were called using gatk  
581 HaplotypeCaller. The output vcf files were then normalized using bcftool norm command and  
582 the reconstructed virus sequences were generated using bcftools consensus command.  
583 Regions without any mapped reads were masked by 'N' using a custom Python script. The  
584 workflow described here was compiled as a Python pipeline and available from the following  
585 GitHub repository: 'https://github.com/GenomeImmunobiology/Kojima\_et\_al\_2020'.

586 We detected reads mapping to 634 viruses, including 553 phages, in total (Supplemental  
587 figure 1 (the original heat map, showing all viruses by all people)). Phage are ubiquitous in the  
588 human virome and thus should not necessarily be excluded as a potential source of horizontal  
589 gene flow to humans (56). Phage-mapped reads were often found, however they were present



590 at low depth inconsistent with germline integration into human genomes, and were thus  
591 excluded from further analysis. The same was true of most eukaryotic viruses, which showed  
592 low average read depth, usually less than 1x across the entire length of the viral genome. This  
593 may reflect virus infection in a small proportion of cells, contamination from other samples  
594 sequenced on the same machine, or mis-mapping. As the primary goal of this study was to  
595 detect potentially heritable virus-derived structural variants, these were not analyzed further.

596

#### 597 *Endogenous HHV-6 detection and reconstruction from WGS*

598 We developed a bioinformatic pipeline specialized to detect and reconstruct full-length  
599 endogenous HHV-6 as well as solo-DR form, because endogenous HHV-6 has a terminal direct  
600 repeat sequence (DR), which is not appropriately reconstructed using the virus detection and  
601 reconstruction pipeline described above. We extracted reads that did not map to the human  
602 genome and mapped these reads to the reference HHV-6 using the same commands described  
603 above. Rather than all viral sequences for HHV-6 reconstruction, we used full-length exogenous  
604 HHV-6 genomes NC\_001664.4 and NC\_000898.1 as HHV-6A and HHV-6B, respectively. We  
605 judged whether a WGS dataset contains abundant HHV-6 reads using the same cutoff  
606 described above. When abundant HHV-6 reads were detected, we reconstructed the full-length  
607 HHV-6 sequence using the same reconstruction protocol as described above. The DR region of  
608 a reconstructed full-length genome is not accurate, because reads mapping to DR are mapped  
609 to both left DR and right DR. The reads with multimapping have the mapping score 0, being  
610 excluded from downstream variant calling. To accurately reconstruct DR, all reads mapping to  
611 HHV-6 genomes were re-mapped to DR-only. For this reconstruction, we used nucleotides 1-  
612 1089 of NC\_001664.4 and 1-8793 of NC\_000898.1 as DR-only sequences of HHV-6A and  
613 HHV-6B, respectively. The workflow described here was compiled as a Python pipeline and  
614 available from the following GitHub repository:

615 '[https://github.com/GenomeImmunobiology/Kojima\\_et\\_al\\_2020](https://github.com/GenomeImmunobiology/Kojima_et_al_2020)'.

616 For validation of the accuracy of endogenous HHV-6 reconstruction, we used a 35x  
617 coverage WGS dataset from subject NA18999, a Japanese subject known to contain full-length  
618 endogenous HHV-6A (Supplementary Figure 7). The reconstructed sequence covered 96% of  
619 the reference genome (U1102) with 96.7% similarity. Phylogenetic analysis of the reconstructed  
620 sequence with sequences from this subject previously determined by Sanger sequencing  
621 demonstrate that the reconstructed sequence is very close to that determined by Sanger  
622 sequencing. To understand the influence of WGS depth on the accuracy of endogenous HHV-6  
623 reconstruction, we downsampled the dataset to approximately 30x, 20x, 15x, 10x, and 5x  
624 autosome depths using the `picard DownsampleSam` function. Our pipeline detected  
625 endogenous HHV-6 at all read depths, and had accuracy near that of Sanger sequencing when  
626 the depth was higher than 15x. This demonstrates that, from moderate- to high-depth WGS  
627 datasets, our pipeline can reconstruct relatively accurate endogenous HHV-6 sequences  
628 suitable for phylogenetic analysis.

629

#### 630 *Visualization of virus-chromosome hybrid reads*

631 WGS reads that failed to map to the reference human genome were mapped to viruses  
632 using the pipeline described above. To detect virus-chromosome hybrid reads, read pairs with  
633 one read mapped to a virus and the paired read not mapped to the same virus were retrieved

634 using `samtools view -f 8` command. Then, the unmapped mate reads were mapped to the  
635 reference human genome GRCh38DH using `blastn -evalue 1e-15 -culling\_limit 2 -  
636 qcov\_hsp\_perc 90 -perc\_identity 95 -word\_size 11` command. Then, reads uniquely mapped to  
637 the human genome were retrieved and the mapped positions of the hybrid reads on the virus  
638 genomes and the human genome were visualized using a custom Python script. Because both  
639 SMRV and HTLV-1 have LTRs, reads mapped to 3'LTR were re-mapped to 5' LTR. The script  
640 used for visualization is available from the following GitHub repository:  
641 '[https://github.com/GenomeImmunobiology/Kojima\\_et\\_al\\_2020](https://github.com/GenomeImmunobiology/Kojima_et_al_2020)'.

642

#### 643 *Phylogenetic analysis of endogenous HHV-6*

644 To reconstruct phylogenetic trees of U regions, we used full-length genomes  
645 reconstructed by the endogenous HHV-6 reconstruction pipeline described above. The  
646 reconstructed sequences were aligned with known endogenous and exogenous HHV-6 using  
647 `mafft --auto` command. To exclude the regions thought to have low reconstruction accuracy,  
648 we removed DR and repeat sequences annotated in NCBI from the alignment. We removed  
649 regions corresponding to nucleotides 0-8089, 127548-128233, 131076-131854, 140075-  
650 140951, and 151288-159378 of HHV-6A NC\_001664.4 and 0-8793, 9314-9510, 129045-  
651 129681, 133500-133863, 133981-134076, 140081-142691, and 153321-162114 of HHV-6B  
652 NC\_000898.1 (all start positions here are 0-based numbering and end positions are 1-based  
653 numbering) using a custom Python script. Then, phylogenetic trees were inferred by the  
654 maximum likelihood method with the complete deletion option using MEGA X software. The  
655 Kimura 2-parameter model was used. The reliability of each internal branch was assessed by  
656 100 bootstrap resamplings. The phylogenetic trees were visualized using ETEtoolkit.

657 To reconstruct phylogenetic trees of DR regions, we used DR reconstructed by the  
658 endogenous HHV-6 reconstruction pipeline described above. The reconstructed sequences are  
659 aligned with known endogenous and exogenous HHV-6 using `mafft --auto` command. To  
660 exclude the regions thought to have low reconstruction accuracy, we removed simple repeats  
661 and low complexity sequences from the alignment. To define simple repeats and low complexity  
662 sequences, we used RepeatMasker. We masked the reference HHV-6 (NC\_001664.4 and  
663 NC\_000898.1) with a `repeatmasker -s -no\_is` command. We removed the regions  
664 corresponding to nucleotides 0-376, 1682-1730, 2302-2367, 2369-2451, 2692-2733, 3149-  
665 3181, 3433-3502, 3626-3670, 7483-7519, 7655-8089 of HHV-6A NC\_001664.4 and 0-393,  
666 1926-2011, 2674-2717, 3013-3067, 3670-3713, 3959-3988, 8248-8793 of HHV-6B  
667 NC\_000898.1 (all start positions here are 0-based numbering and end positions are 1-based  
668 numbering) using a custom Python script. Then, phylogenetic trees were inferred and visualized  
669 as described above. The scripts used for phylogenetic analysis and the newick files of the  
670 phylogenetic trees are available from the following GitHub repository:  
671 '[https://github.com/GenomeImmunobiology/Kojima\\_et\\_al\\_2020](https://github.com/GenomeImmunobiology/Kojima_et_al_2020)'.

672

#### 673 *Processing of RNA-sequencing datasets*

674 The SRA files of the Geuvadis RNA-seq dataset were downloaded from NCBI using  
675 the `prefetch` command in the NCBI SRA-tools. We used 159 datasets derived from LCL of  
676 Utah residents. The downloaded SRA files were converted to FASTQ files using `fasterq-dump`  
677 command in the NCBI SRA-tools with `-S` option. Paired-reads were then filtered using fastp

678 software with ``-l 20 -3 -W 4 -M 20 -t 1 -T 1 -x`` options. The filtered paired-reads were then  
679 mapped to the human genome 'GRCh38.p13.genome.fa' downloaded from GenCode. For  
680 mapping, we used STAR software with ``--quantMode GeneCounts --twopassMode Basic --  
681 outFilterType BySJout --outFilterMultimapNmax 20 --alignSJoverhangMin 8 --  
682 alignSJDBoverhangMin 1 --outFilterMismatchNmax 999 --outFilterMismatchNoverReadLmax  
683 0.04 --alignIntronMin 20 --alignIntronMax 1000000 --alignMatesGapMax 1000000`` options. We  
684 provided the human gene annotation 'gencode.v33.annotation.gtf' downloaded from GenCode  
685 when indexing the reference human genome using STAR.

686

### 687 *Differential gene analysis*

688 The 159 RNA-seq datasets were derived from 90 LCLs. Because some LCLs were  
689 represented by two different RNA-seq datasets, we merged the count tables originating from  
690 LCLs from the same donor. To remove low-expression genes from differential gene expression  
691 analysis (DE analysis), we calculated the average FPKM in 90 datasets and genes with FPKM  
692 lower than 1 were excluded from the downstream analysis. 43,585 genes were removed by this  
693 filtering, leaving 17,077 genes. 5 LCLs with a very low number of SMRV WGS reads (NA12286,  
694 NA12287, NA11930, NA12760, and NA11840), as these could potentially be derived from other  
695 SMRV-positive samples sequenced on the same lane, were excluded from the downstream  
696 analysis. The count tables generated by STAR were used for DE analysis. DE analysis was  
697 performed using the DESeq function in the DESeq2 package. For visualization, count tables  
698 were normalized by the counts function in the DESeq2 package with a ``normalized=TRUE``  
699 option. Genes with p-value lower than 0.05 and changed by at least 2-fold were defined as  
700 genes with significant expression changes.

701

### 702 *HERV-K k-mer counting*

703 If a presence/absence-type polymorphic HERV-K contains a unique region which  
704 distinguishes it from the other HERV-K loci, the presence/absence pattern of this HERV-K in  
705 humans should match to the presence/absence pattern of WGS reads originating from the  
706 unique region. To comprehensively find such *k*-mers, we exploited *k*-mer hashing of WGS  
707 reads. We first mapped WGS reads to a reference HERV-K (HERV-K113, NC\_022518.1) and  
708 hashed mapped reads into *k*-mers. We excluded the LTR region from this analysis, because the  
709 LTR of HERV-K has a high similarity to SVA. Because of this exclusion criteria, our method  
710 captures *k*-mers derived from the HERV-K provirus, but does not detect polymorphisms of solo-  
711 LTRs.

712 FASTQ files of 2,504 1kGP high-coverage samples were downloaded from the  
713 following URL: `'ftp://ftp.1000genomes.ebi.ac.uk/vol1/ftp/phase3/data/'`. FASTQ files of the Han  
714 Chinese trio were downloaded from the following URL:  
715 `'https://www.internationalgenome.org/data-portal/data-collection/structural-variation'`. The  
716 FASTQ reads were mapped to the HERV-K reference sequence using Hisat2 with ``--mp 2,1 --  
717 no-spliced-alignment`` options and stored as BAM files. To exclude LTR regions for analysis, the  
718 reads mapped to 968-8504 of the HERV-K113 genome (start position is 0-based numbering and  
719 end position is 1-based numbering) were used for downstream analysis. To reduce the  
720 computational burden of *k*-mer counting, the HERV-K113 genome was split into 50-bp bins with  
721 a 10-bp sliding window. Then, sequences of the mapped reads corresponding to the HERV-K

722 50-bp bins were listed from the BAM files using a custom Python script. We defined those  
723 sequences as HERV-K *k*-mers. This detected 460,491 different HERV-K *k*-mers from 2,504  
724 subjects in 1kGP. The occurrence of each HERV-K *k*-mer was counted by each sample using a  
725 custom Python script. The workflow described here was compiled as a Python pipeline and  
726 available from the following GitHub repository:

727 '[https://github.com/GenomeImmunobiology/Kojima\\_et\\_al\\_2020](https://github.com/GenomeImmunobiology/Kojima_et_al_2020)'.

728 To normalize the *k*-mer occurrence by the depth of human autosomes, we calculated  
729 the chromosome depths using `samtools coverage` command. For this calculation, we used  
730 CRAM files of the 2,504 high-coverage WGS provided from 1kGP (downloaded as described in  
731 the 'WGS datasets' section). Then, we calculated the mean depth of chromosome 1 to 22,  
732 which we refer to as the autosome depth. The *k*-mer occurrence of each dataset was divided by  
733 the calculated autosome and used as a normalized value.

#### 734 *Definition of high-frequency presence/absence-type HERV-K k-mers*

735 To perform GWA analysis using polymorphic HERV-K *k*-mers, we decided to focus on  
736 HERV-K *k*-mers above a certain frequency threshold. Very rare *k*-mers would often be  
737 individual- or population- specific and thus be less informative for findingg association with  
738 SNVs from the trans-ethnic datasets. Therefore, we discarded presence/absence-type *k*-mers  
739 which were detected in less than 50 subjects ( $n=8,642$ ) and we defined the remaining ones as  
740 high-frequency HERV-K *k*-mers.

#### 741 *Clustering of HERV-K k-mers*

742 To perform hierarchical clustering of the frequencies of the presence/absence-type  
743 HERV-K *k*-mers by the 26 human populations, the mean *k*-mer frequencies in each population  
744 was first calculated. Then the mean *k*-mer frequencies of the 26 populations were clustered with  
745 Ward's method in the clutermat function in the seaborn Python package.

746 To perform hierarchical clustering of the Pearson correlation coefficient of the high-  
747 frequency presence/absence-type HERV-K *k*-mers, we generated an all-by-all Pearson  
748 correlation coefficient matrix for presence/absence patterns of *k*-mers and performed  
749 hierarchical clustering of *k*-mers. The Pearson correlation coefficient was calculated by the corr  
750 function in the Python Pandas package. The *k*-mers were then clustered by Ward's method in  
751 the clutermat function in the seaborn Python package.

752 Prior to GWA analysis, we formally defined clusters using DBSCAN. We clustered the  
753 all-by-all Pearson correlation coefficient matrix for presence/absence patterns of *k*-mers. We  
754 used the DBSCAN function in the Python scikit-learn package. Any mutation in the HERV-K  
755 provirus should actually result in 5 different *k*-mers, because we listed up *k*-mers corresponding  
756 to the reference HERV-K sequences scanned by 50-bp bins with a 10-bp window. Therefore,  
757 we used 5 for the `min\_samples` parameter. We used 2.5 for the `eps` parameter. To determine  
758 appropriate epsilon, we performed DBSCAN using 0.5, 1.0, 1.5, 2.0, 2.5, 3.0, 3.5, and 4.0. The  
759 clustering results were visually cross-referenced with the result of hierarchical clustering, and an  
760 epsilon of 2.5 was chosen because it showed good concordance with the results of the  
761 hierarchical clustering while defining few enough clusters to allow GWA analysis using a  
762 reasonable computational load. The largest cluster defined by DBSCAN contained 175 unique  
763 *k*-mers.

766

### 767 *GWA analysis*

768 The presence and absence of HERV-K *k*-mers in *k*-mer clusters defined by DBSCAN were then  
769 converted to categorical values. To reduce the computational cost of GWA analysis, we  
770 generated a consensus presence/absence pattern of *k*-mers in each cluster defined by  
771 DBSCAN. If a WGS dataset contained more than 80% of the *k*-mers in a *k*-mer cluster, the  
772 dataset was considered as a *k*-mer-positive dataset and labeled as 1, while a WGS dataset  
773 contained no or 80% or less number of *k*-mers in the *k*-mer cluster, the dataset was considered  
774 as a *k*-mer-negative dataset and labeled as 0. These presence/absence binary categorical  
775 values were used for the GWA analysis. For SNV annotations, we used GRCh38\_v1a  
776 downloaded from  
777 'ftp://ftp.1000genomes.ebi.ac.uk/vol1/ftp/data\_collections/1000\_genomes\_project/release/20181  
778 203\_biallelic\_SNV/'. We first removed SNVs with low frequency (< 1%), those violating Hardy-  
779 Weinberg equilibrium ( $1e-05$ ), and those with high missing call rate (> 5%) using plink2 software  
780 with `--geno 0.05 --hwe 0.00001 --maf 0.01` options. Then the SNVs were pruned using plink2  
781 software with `--maf 0.05 --indep-pairwise 100kb 0.5` options. PCA was performed using plink2  
782 software using pruned SNVs. Association analysis was performed using plink2 with covariates  
783 and binary categorical values representing the presence and absence status of *k*-mers. The sex  
784 of WGS datasets and the eigen vectors generated by PCA were used as covariates. Because  
785 we performed 599 association tests, we set  $8.33e-11$  as the genome-wide significant p-value  
786 threshold.

787

### 788 *Detection of HERV-K k-mer-associated loci*

789 To determine genome loci associated with the HERV-K *k*-mer clusters in GWA  
790 analysis, we first defined genome regions with association by each *k*-mer cluster. If two SNVs  
791 with significant p-values were within 1 Mb of one another, we considered those two SNVs to be  
792 within the same *k*-mer-associated locus. Otherwise, we considered the two SNVs to be in two  
793 separate *k*-mer-associated loci. If a *k*-mer-associated locus harbored 10 or more SNVs, we  
794 considered the genome region as a *k*-mer-associated locus, and the largest continuous region  
795 containing SNVs with association p values below the  $8.33e-11$  threshold were defined as a *k*-  
796 mer-associated loci. We detected 589 loci from 503 *k*-mer clusters. Because the same locus  
797 was detected in multiple GWA analyses with different *k*-mer clusters, we merged 589 genome  
798 regions using BEDTools merge command. Finally, we obtained 79 genome loci associated with  
799 HERV-K *k*-mers. The HERV-K *k*-mer-associated loci are available from the following GitHub  
800 repository: '[https://github.com/GenomeImmunobiology/Kojima\\_et\\_al\\_2020](https://github.com/GenomeImmunobiology/Kojima_et_al_2020)'.

801

### 802 *Evaluation of LDfred to detect unknown HERV-K polymorphisms*

803 To assess the sensitivity of LDfred to detect previously unknown polymorphisms, we  
804 used structural variations (SVs) in three subjects (NA12878, NA19434, HG00268) called by  
805 Audano et al. We extracted deletions that intersect with HERV-K annotated by RepeatMasker  
806 using the repeat library version 24.01 from Repbase. We detected 24 deletions in at least one in  
807 the three subjects. These 24 deletions ranged from 72 to 9,468-bp. We checked if these HERV-  
808 K SVs were located within loci associated with *k*-mer clusters identified by LDfred. Seventeen  
809 out of 24 were located with loci associated with *k*-mer clusters. Next we checked the

810 consistency of the presence-absence patterns between *k*-mers and the deletions. When the *k*-  
811 mer presence-absence pattern of a *k*-mer cluster and the presence-absence pattern of the  
812 overlapping deletions were exactly the same, we considered that the LDfred result accurately  
813 reflected the HERV-K polymorphism. For example, if a presence pattern of *k*-mers in a *k*-mer  
814 cluster is (NA12878 = +, NA19434 = -, HG00268 = +) and the presence of HERV-K in the  
815 associated locus has the same pattern (NA12878 = +, NA19434 = -, HG00268 = +), we  
816 considered that LDfred detected the HERV-K polymorphism. On the other hand, if a presence  
817 pattern of *k*-mers in a *k*-mer cluster was (NA12878 = +, NA19434 = -, HG00268 = +) and the  
818 presence of HERV-K in the associated locus has different pattern (NA12878 = -, NA19434 = -,  
819 HG00268 = +), we considered that the LDfred result did not accurately reflect the HERV-K  
820 polymorphism. We detected 9 loci associating with *k*-mer clusters which harbor polymorphic  
821 HERV-K with consistent presence-absence patterns.

822

### 823 *Dot matrix analysis*

824 The PacBio alignments to the human genome were downloaded from the following URL:  
825 '[http://ftp.1000genomes.ebi.ac.uk/vol1/ftp/data\\_collections/hgsv\\_sv\\_discovery/working/](http://ftp.1000genomes.ebi.ac.uk/vol1/ftp/data_collections/hgsv_sv_discovery/working/)'. To  
826 generate a dot matrix between a PacBio sequence and the reference human genome, first,  
827 similar sequences between two input sequences were detected and aligned using blastn with `  
828 evaluate 1 -word\_size 7 -dust no` options. Then, the alignment was visualized by a custom  
829 Python script. The script used for this analysis is available from the following GitHub repository:  
830 '[https://github.com/GenomeImmunobiology/Kojima\\_et\\_al\\_2020](https://github.com/GenomeImmunobiology/Kojima_et_al_2020)'.

831

### 832 *Detection of SMRV by PCR*

833 The following cell lines were obtained from the NIGMS Human Genetic Cell Repository  
834 at the Coriell Institute for Medical Research: GM18998, GM18999, GM12878, GM12399, and  
835 GM11920. To confirm the existence of SMRV DNA in LCLs, we designed SMRV-specific  
836 primers and amplified SMRV DNA by PCR. Total DNA extracted from GM12399, GM11920,  
837 GM18998 were used as PCR templates. PCR primers used are listed in the Supplementary  
838 Table 5.

839

### 840 *Amplification of HERV-K by PCR and mapping to the human genome*

841 Genome regions containing HERV-K in interest were amplified by PCR. Total DNA  
842 extracted from GM18998, GM18999, GM12878 were used as PCR templates. The amplicons  
843 were barcoded and sequenced using an Oxford Nanopore flongle flow cell. We obtained  
844 18,702, 30,651, and 18,604 reads from each subject which passed standard minKNOW v3.6.5  
845 quality control from these LCLs, respectively. The reads were mapped to GRCh38DH by bwa  
846 mem with the `*-Y -K 1000000 -x ont2d*` option. Because the HERV-K sequences could  
847 potentially be mis-aligned to multiple HERV-K loci, reads harboring sequences which mapping  
848 to the non-HERV-K regions at the termini of each PCR amplicon were extracted using a custom  
849 script. Finally, we obtained 2,928, 6,676, and 5,660 mapped reads, respectively. PCR primers  
850 used are listed in the Supplementary Table 5. A mutation rate of  $0.5 \times 10^{-9}$  substitutions per  
851 base, per year was assumed to estimate the age of the novel haplotypes (41).

852

### 853 *Software versions*

854 Python 3.7.4  
855 scikit-learn 0.22.1  
856 biopython 1.74  
857 pandas 0.25.1  
858 seaborn 0.10.1  
859 pysam 0.15.2  
860 MEGA X 10.0.5  
861 MAFFT v7.407  
862 ete3 3.1.2  
863 STAR 2.7.3a  
864 R 3.6.1  
865 DESeq2 1.22.2  
866 BLAST 2.9.0+  
867 samtools 1.10  
868 bedtools v2.29.2  
869 bcftools 1.9  
870 Hisat2 version 2.2.0  
871 PLINK v2.00a2.3LM  
872 prefetch 2.9.3  
873 fasterq-dump 2.9.6  
874 bamCoverage 3.4.1  
875 RepeatMasker 4.0.9  
876  
877  
878

879 **Acknowledgements**

880 The authors wish to acknowledge the resources of 1,000 Genomes Project and HGDP-CEPH  
881 Human Genome Diversity Cell Line Panel. We thank Thomas Sasani, Lynn Jorde, Aaron  
882 Quinlan, Julie E. Feusier, and Cody Steely for providing unmapped reads from phs001872, and  
883 Mark Lathrop for helpful discussions about LCLs generated by CEPH. The super-computing  
884 resources were provided by Human Genome Center, the Institute of Medical Science, the  
885 University of Tokyo (SHIROKANE), and the Office for Information Systems and Cybersecurity,  
886 RIKEN (HOKUSAI General Use project G20021). N.F.P. acknowledges funding from Cluster for  
887 Pioneering Research under the Hakubi fellowship program and from the discretionary budget of  
888 the Director of the RIKEN Center for Integrative Medical Sciences, Dr. Kazuhiko Yamamoto.

889

890

891



892 **Reference**

893

- 894 1. Prüfer K, de Filippo C, Grote S, Mafessoni F, Korlević P, Hajdinjak M, Vernot B, Skov L,  
895 Hsieh P, Peyrégne S, Reher D, Hopfe C, Nagel S, Maricic T, Fu Q, Theunert C, Rogers  
896 R, Skoglund P, Chintalapati M, Dannemann M, Nelson BJ, Key FM, Rudan P, Kučan Ž,  
897 Gušić I, Golovanova L V, Doronichev VB, Patterson N, Reich D, Eichler EE, Slatkin M,  
898 Schierup MH, Andrés AM, Kelso J, Meyer M, Pääbo S. 2017. A high-coverage  
899 Neandertal genome from Vindija Cave in Croatia. *Science* 358:655–658.
- 900 2. Wildschutte JH, Williams ZH, Montesion M, Subramanian RP, Kidd JM, Coffin JM. 2016.  
901 Discovery of unfixed endogenous retrovirus insertions in diverse human populations.  
902 *Proc Natl Acad Sci* 113:E2326 LP-E2334.
- 903 3. Lander ES, Linton LM, Birren B, Nusbaum C, Zody MC, Baldwin J, Devon K, Dewar K,  
904 Doyle M, FitzHugh W, Funke R, Gage D, Harris K, Heaford A, Howland J, Kann L,  
905 Lehoczký J, LeVine R, McEwan P, McKernan K, Meldrim J, Mesirov JP, Miranda C,  
906 Morris W, Naylor J, Raymond C, Rosetti M, Santos R, Sheridan A, Sougnez C, Stange-  
907 Thomann Y, Stojanovic N, Subramanian A, Wyman D, Rogers J, Sulston J, Ainscough R,  
908 Beck S, Bentley D, Burton J, Clee C, Carter N, Coulson A, Deadman R, Deloukas P,  
909 Dunham A, Dunham I, Durbin R, French L, Grafham D, Gregory S, Hubbard T, Humphray  
910 S, Hunt A, Jones M, Lloyd C, McMurray A, Matthews L, Mercer S, Milne S, Mullikin JC,  
911 Mungall A, Plumb R, Ross M, Shownkeen R, Sims S, Waterston RH, Wilson RK, Hillier  
912 LW, McPherson JD, Marra MA, Mardis ER, Fulton LA, Chinwalla AT, Pepin KH, Gish  
913 WR, Chissoe SL, Wendl MC, Delehaunty KD, Miner TL, Delehaunty A, Kramer JB, Cook  
914 LL, Fulton RS, Johnson DL, Minx PJ, Clifton SW, Hawkins T, Branscomb E, Predki P,  
915 Richardson P, Wenning S, Slezak T, Doggett N, Cheng JF, Olsen A, Lucas S, Elkin C,  
916 Uberbacher E, Frazier M, Gibbs RA, Muzny DM, Scherer SE, Bouck JB, Sodergren EJ,  
917 Worley KC, Rives CM, Gorrell JH, Metzker ML, Naylor SL, Kucherlapati RS, Nelson DL,  
918 Weinstock GM, Sakaki Y, Fujiyama A, Hattori M, Yada T, Toyoda A, Itoh T, Kawagoe C,  
919 Watanabe H, Totoki Y, Taylor T, Weissenbach J, Heilig R, Saurin W, Artiguenave F,  
920 Brottier P, Bruls T, Pelletier E, Robert C, Wincker P, Smith DR, Doucette-Stamm L,  
921 Rubenfield M, Weinstock K, Lee HM, Dubois J, Rosenthal A, Platzer M, Nyakatura G,  
922 Taudien S, Rump A, Yang H, Yu J, Wang J, Huang G, Gu J, Hood L, Rowen L, Madan A,  
923 Qin S, Davis RW, Federspiel NA, Abola AP, Proctor MJ, Myers RM, Schmutz J, Dickson  
924 M, Grimwood J, Cox DR, Olson M V, Kaul R, Raymond C, Shimizu N, Kawasaki K,  
925 Minoshima S, Evans GA, Athanasiou M, Schultz R, Roe BA, Chen F, Pan H, Ramser J,  
926 Lehrach H, Reinhardt R, McCombie WR, de la Bastide M, Dedhia N, Blöcker H,  
927 Hornischer K, Nordsiek G, Agarwala R, Aravind L, Bailey JA, Bateman A, Batzoglou S,  
928 Birney E, Bork P, Brown DG, Burge CB, Cerutti L, Chen HC, Church D, Clamp M, Copley  
929 RR, Doerks T, Eddy SR, Eichler EE, Furey TS, Galagan J, Gilbert JG, Harmon C,  
930 Hayashizaki Y, Haussler D, Hermjakob H, Hokamp K, Jang W, Johnson LS, Jones TA,  
931 Kasif S, Kasprzyk A, Kennedy S, Kent WJ, Kitts P, Koonin E V, Korf I, Kulp D, Lancet D,  
932 Lowe TM, McLysaght A, Mikkelsen T, Moran J V, Mulder N, Pollara VJ, Ponting CP,  
933 Schuler G, Schultz J, Slater G, Smit AF, Stupka E, Szustakowki J, Thierry-Mieg D,  
934 Thierry-Mieg J, Wagner L, Wallis J, Wheeler R, Williams A, Wolf YI, Wolfe KH, Yang SP,  
935 Yeh RF, Collins F, Guyer MS, Peterson J, Felsenfeld A, Wetterstrand KA, Patrinos A,  
936 Morgan MJ, de Jong P, Catanese JJ, Osoegawa K, Shizuya H, Choi S, Chen YJ,  
937 Szustakowki J. 2001. Initial sequencing and analysis of the human genome. *Nature*  
938 409:860–921.
- 939 4. Li W, Lin L, Malhotra R, Yang L, Acharya R, Poss M. 2019. A computational framework to  
940 assess genome-wide distribution of polymorphic human endogenous retrovirus-K in  
941 human populations. *PLoS Comput Biol* 15:e1006564.

- 942 5. Macfarlane CM, Badge RM. 2015. Genome-wide amplification of proviral sequences  
943 reveals new polymorphic HERV-K(HML-2) proviruses in humans and chimpanzees that  
944 are absent from genome assemblies. *Retrovirology* 12:35.
- 945 6. Thomas J, Perron H, Feschotte C. 2018. Variation in proviral content among human  
946 genomes mediated by LTR recombination. *Mob DNA* 9:36.
- 947 7. Belshaw R, Dawson ALA, Woolven-Allen J, Redding J, Burt A, Tristem M. 2005.  
948 Genomewide screening reveals high levels of insertional polymorphism in the human  
949 endogenous retrovirus family HERV-K(HML2): implications for present-day activity. *J*  
950 *Virol* 79:12507–12514.
- 951 8. Subramanian RP, Wildschutte JH, Russo C, Coffin JM. 2011. Identification,  
952 characterization, and comparative genomic distribution of the HERV-K (HML-2) group of  
953 human endogenous retroviruses. *Retrovirology* 8:90.
- 954 9. Bhardwaj N, Montesion M, Roy F, Coffin JM. 2015. Differential expression of HERV-K  
955 (HML-2) proviruses in cells and virions of the teratocarcinoma cell line Tera-1. *Viruses*  
956 7:939–968.
- 957 10. Horie M, Honda T, Suzuki Y, Kobayashi Y, Daito T, Oshida T, Ikuta K, Jern P, Gojobori T,  
958 Coffin JM, Tomonaga K. 2010. Endogenous non-retroviral RNA virus elements in  
959 mammalian genomes. *Nature* 463:84–7.
- 960 11. Zhang E, Bell AJ, Wilkie GS, Suárez NM, Batini C, Veal CD, Armendáriz-Castillo I,  
961 Neumann R, Cotton VE, Huang Y, Porteous DJ, Jarrett RF, Davison AJ, Royle NJ. 2017.  
962 Inherited Chromosomally Integrated Human Herpesvirus 6 Genomes Are Ancient, Intact,  
963 and Potentially Able To Reactivate from Telomeres. *J Virol* 91.
- 964 12. Liu X, Kosugi S, Koide R, Kawamura Y, Ito J, Miura H, Matoba N, Matsuzaki M, Fujita M,  
965 Kamada AJ, Nakagawa H, Tamiya G, Matsuda K, Murakami Y, Kubo M, Aswad A, Sato  
966 K, Momozawa Y, Ohashi J, Terao C, Yoshikawa T, Parrish NF, Kamatani Y. 2020.  
967 Endogenization and excision of human herpesvirus 6 in human genomes. *PLoS Genet*  
968 16:e1008915.
- 969 13. Aswad A, Aimola G, Wight D, Roychoudhury P, Zimmermann C, Hill J, Lassner D, Xie H,  
970 Huang M-L, Parrish NF, Schultheiss H-P, Venturini C, Lager S, Smith GCS, Charnock-  
971 Jones DS, Breuer J, Greninger AL, Kaufer BB. 2020. Evolutionary history of endogenous  
972 Human Herpesvirus 6 reflects human migration out of Africa. *Mol Biol Evol*.
- 973 14. Weismann A. 1893. *The germ-plasm: a theory of heredity*. Scribner's.
- 974 15. Sudmant PH, Rausch T, Gardner EJ, Handsaker RE, Abyzov A, Huddleston J, Zhang Y,  
975 Ye K, Jun G, Fritz MH-Y, Konkel MK, Malhotra A, Stütz AM, Shi X, Casale FP, Chen J,  
976 Hormozdiari F, Dayama G, Chen K, Malig M, Chaisson MJP, Walter K, Meiers S, Kashin  
977 S, Garrison E, Auton A, Lam HYK, Mu XJ, Alkan C, Antaki D, Bae T, Cerveira E, Chines  
978 P, Chong Z, Clarke L, Dal E, Ding L, Emery S, Fan X, Gujral M, Kahveci F, Kidd JM,  
979 Kong Y, Lameijer E-W, McCarthy S, Flicek P, Gibbs RA, Marth G, Mason CE, Menelaou  
980 A, Muzny DM, Nelson BJ, Noor A, Parrish NF, Pendleton M, Quitadamo A, Raeder B,  
981 Schadt EE, Romanovitch M, Schlattl A, Sebra R, Shabalín AA, Untergasser A, Walker JA,  
982 Wang M, Yu F, Zhang C, Zhang J, Zheng-Bradley X, Zhou W, Zichner T, Sebat J, Batzer  
983 MA, McCarroll SA, Mills RE, Gerstein MB, Bashir A, Stegle O, Devine SE, Lee C, Eichler  
984 EE, Korbé JO. 2015. An integrated map of structural variation in 2,504 human genomes.  
985 *Nature* 526:75–81.
- 986 16. Collins RL, Brand H, Karczewski KJ, Zhao X, Alföldi J, Francioli LC, Khera A V, Lowther  
987 C, Gauthier LD, Wang H, Watts NA, Solomonson M, O'Donnell-Luria A, Baumann A,  
988 Munshi R, Walker M, Whelan CW, Huang Y, Brookings T, Sharpe T, Stone MR, Valkanas  
989 E, Fu J, Tiao G, Laricchia KM, Ruano-Rubio V, Stevens C, Gupta N, Cusick C, Margolin  
990 L, Taylor KD, Lin HJ, Rich SS, Post WS, Chen Y-DI, Rotter JI, Nusbaum C, Philippakis A,  
991 Lander E, Gabriel S, Neale BM, Kathiresan S, Daly MJ, Banks E, MacArthur DG,

992 Talkowski ME. 2020. A structural variation reference for medical and population genetics.  
993 Nature 581:444–451.

994 17. Almarri MA, Bergström A, Prado-Martinez J, Yang F, Fu B, Dunham AS, Chen Y, Hurler  
995 ME, Tyler-Smith C, Xue Y. 2020. Population Structure, Stratification, and Introgression of  
996 Human Structural Variation. Cell 182:189-199.e15.

997 18. Moustafa A, Xie C, Kirkness E, Biggs W, Wong E, Turpaz Y, Bloom K, Delwart E, Nelson  
998 KE, Venter JC, Telenti A. 2017. The blood DNA virome in 8,000 humans. PLoS Pathog  
999 13:e1006292.

1000 19. Liu S, Huang S, Chen F, Zhao L, Yuan Y, Francis SS, Fang L, Li Z, Lin L, Liu R, Zhang Y,  
1001 Xu H, Li S, Zhou Y, Davies RW, Liu Q, Walters RG, Lin K, Ju J, Korneliusson T, Yang  
1002 MA, Fu Q, Wang J, Zhou L, Krogh A, Zhang H, Wang W, Chen Z, Cai Z, Yin Y, Yang H,  
1003 Mao M, Shendure J, Wang J, Albrechtsen A, Jin X, Nielsen R, Xu X. 2018. Genomic  
1004 Analyses from Non-invasive Prenatal Testing Reveal Genetic Associations, Patterns of  
1005 Viral Infections, and Chinese Population History. Cell 175:347-359.e14.

1006 20. Bergström A, McCarthy SA, Hui R, Almarri MA, Ayub Q, Danecek P, Chen Y, Felkel S,  
1007 Hallast P, Kamm J, Blanché H, Deleuze J-F, Cann H, Mallick S, Reich D, Sandhu MS,  
1008 Skoglund P, Scally A, Xue Y, Durbin R, Tyler-Smith C. 2020. Insights into human genetic  
1009 variation and population history from 929 diverse genomes. Science 367.

1010 21. Auton A, Brooks LD, Durbin RM, Garrison EP, Kang HM, Korbel JO, Marchini JL,  
1011 McCarthy S, McVean GA, Abecasis GR. 2015. A global reference for human genetic  
1012 variation. Nature 526:68–74.

1013 22. Sun R, Grogan E, Shedd D, Bykovsky AF, Kushnaryov VM, Grossberg SE, Miller G.  
1014 1995. Transmissible retrovirus in Epstein-Barr virus-producer B95-8 cells. Virology  
1015 209:374–383.

1016 23. Cheval J, Muth E, Gonzalez G, Couplier M, Beurdeley P, Cruveiller S, Eloit M. 2019.  
1017 Adventitious Virus Detection in Cells by High-Throughput Sequencing of Newly  
1018 Synthesized RNAs: Unambiguous Differentiation of Cell Infection from Carryover of Viral  
1019 Nucleic Acids. mSphere 4.

1020 24. Rhim JS, Schell K, Creasy B, Case W. 1969. Biological characteristics and viral  
1021 susceptibility of an African green monkey kidney cell line (Vero). Proc Soc Exp Biol Med  
1022 Soc Exp Biol Med (New York, NY) 132:670–678.

1023 25. Feusier J, Watkins WS, Thomas J, Farrell A, Witherspoon DJ, Baird L, Ha H, Xing J,  
1024 Jorde LB. 2019. Pedigree-based estimation of human mobile element retrotransposition  
1025 rates. Genome Res 29:1567–1577.

1026 26. Sasani TA, Pedersen BS, Gao Z, Baird L, Przeworski M, Jorde LB, Quinlan AR. 2019.  
1027 Large, three-generation human families reveal post-zygotic mosaicism and variability in  
1028 germline mutation accumulation. Elife 8.

1029 27. Oda T, Ikeda S, Watanabe S, Hatsushika M, Akiyama K, Mitsunobu F. 1988. Molecular  
1030 cloning, complete nucleotide sequence, and gene structure of the provirus genome of a  
1031 retrovirus produced in a human lymphoblastoid cell line. Virology 167:468–476.

1032 28. Lappalainen T, Sammeth M, Friedländer MR, 't Hoen PAC, Monlong J, Rivas MA,  
1033 González-Porta M, Kurbatova N, Griebel T, Ferreira PG, Barann M, Wieland T, Greger L,  
1034 van Iterson M, Almlöf J, Ribeca P, Pulyakhina I, Esser D, Giger T, Tikhonov A, Sultan M,  
1035 Bertier G, MacArthur DG, Lek M, Lizano E, Buermans HPJ, Padioleau I, Schwarzmayr T,  
1036 Karlberg O, Ongen H, Kilpinen H, Beltran S, Gut M, Kahlem K, Amstislavskiy V, Stegle O,  
1037 Pirinen M, Montgomery SB, Donnelly P, McCarthy MI, Flicek P, Strom TM, Lehrach H,  
1038 Schreiber S, Sudbrak R, Carracedo A, Antonarakis SE, Häsler R, Syvänen A-C, van  
1039 Ommen G-J, Brazma A, Meitinger T, Rosenstiel P, Guigó R, Gut IG, Estivill X,  
1040 Dermitzakis ET. 2013. Transcriptome and genome sequencing uncovers functional  
1041 variation in humans. Nature 501:506–511.

- 1042 29. Tan K-T, Ding L-W, Sun Q-Y, Lao Z-T, Chien W, Ren X, Xiao J-F, Loh XY, Xu L, Lill M,  
1043 Mayakonda A, Lin D-C, Yang H, Koeffler HP. 2018. Profiling the B/T cell receptor  
1044 repertoire of lymphocyte derived cell lines. *BMC Cancer* 18:940.
- 1045 30. Sebastian NT, Zaikos TD, Terry V, Taschuk F, McNamara LA, Onafuwa-Nuga A, Yucha  
1046 R, Signer RAJ, Riddell JI V, Bixby D, Markowitz N, Morrison SJ, Collins KL. 2017. CD4 is  
1047 expressed on a heterogeneous subset of hematopoietic progenitors, which persistently  
1048 harbor CXCR4 and CCR5-tropic HIV proviral genomes in vivo. *PLoS Pathog*  
1049 13:e1006509.
- 1050 31. McHugh D, Myburgh R, Caduff N, Spohn M, Kok YL, Keller CW, Murer A, Chatterjee B,  
1051 Rühl J, Engelmann C, Chijioke O, Quast I, Shilaih M, Strouvelle VP, Neumann K, Menter  
1052 T, Dirnhofer S, Lam JK, Hui KF, Bredl S, Schlaepfer E, Sorce S, Zbinden A, Capaul R,  
1053 Lünemann JD, Aguzzi A, Chiang AK, Kempf W, Trkola A, Metzner KJ, Manz MG,  
1054 Grundhoff A, Speck RF, Münz C. 2020. EBV renders B cells susceptible to HIV-1 in  
1055 humanized mice. *Life Sci alliance* 3.
- 1056 32. Telford M, Navarro A, Santpere G. 2018. Whole genome diversity of inherited  
1057 chromosomally integrated HHV-6 derived from healthy individuals of diverse geographic  
1058 origin. *Sci Rep* 8:3472.
- 1059 33. Martens UM, Zijlmans JM, Poon SS, Dragowska W, Yui J, Chavez EA, Ward RK,  
1060 Lansdorp PM. 1998. Short telomeres on human chromosome 17p. *Nat Genet* 18:76–80.
- 1061 34. Payer LM, Steranka JP, Yang WR, Kryatova M, Medabalimi S, Ardeljan D, Liu C, Boeke  
1062 JD, Avramopoulos D, Burns KH. 2017. Structural variants caused by Alu insertions are  
1063 associated with risks for many human diseases. *Proc Natl Acad Sci U S A* 114:E3984–  
1064 E3992.
- 1065 35. Wallace AD, Wendt GA, Barcellos LF, de Smith AJ, Walsh KM, Metayer C, Costello JF,  
1066 Wiemels JL, Francis SS. 2018. To ERV Is Human: A Phenotype-Wide Scan Linking  
1067 Polymorphic Human Endogenous Retrovirus-K Insertions to Complex Phenotypes. *Front*  
1068 *Genet* 9:298.
- 1069 36. Buniello A, MacArthur JAL, Cerezo M, Harris LW, Hayhurst J, Malangone C, McMahon A,  
1070 Morales J, Mountjoy E, Sollis E, Suveges D, Vrousou O, Whetzel PL, Amode R, Guillen  
1071 JA, Riat HS, Trevanion SJ, Hall P, Junkins H, Flicek P, Burdett T, Hindorf LA,  
1072 Cunningham F, Parkinson H. 2019. The NHGRI-EBI GWAS Catalog of published  
1073 genome-wide association studies, targeted arrays and summary statistics 2019. *Nucleic*  
1074 *Acids Res* 47:D1005–D1012.
- 1075 37. Audano PA, Sulovari A, Graves-Lindsay TA, Cantsilieris S, Sorensen M, Welch AE,  
1076 Dougherty ML, Nelson BJ, Shah A, Dutcher SK, Warren WC, Magrini V, McGrath SD, Li  
1077 YI, Wilson RK, Eichler EE. 2019. Characterizing the Major Structural Variant Alleles of the  
1078 Human Genome. *Cell* 176:663-675.e19.
- 1079 38. De Coster W, Van Broeckhoven C. 2019. Newest Methods for Detecting Structural  
1080 Variations. *Trends Biotechnol* 37:973–982.
- 1081 39. Linardopoulou E V, Williams EM, Fan Y, Friedman C, Young JM, Trask BJ. 2005. Human  
1082 subtelomeres are hot spots of interchromosomal recombination and segmental  
1083 duplication. *Nature* 437:94–100.
- 1084 40. Chaisson MJP, Sanders AD, Zhao X, Malhotra A, Porubsky D, Rausch T, Gardner EJ,  
1085 Rodriguez OL, Guo L, Collins RL, Fan X, Wen J, Handsaker RE, Fairley S, Kronenberg  
1086 ZN, Kong X, Hormozdiari F, Lee D, Wenger AM, Hastie AR, Antaki D, Anantharaman T,  
1087 Audano PA, Brand H, Cantsilieris S, Cao H, Cerveira E, Chen C, Chen X, Chin C-S,  
1088 Chong Z, Chuang NT, Lambert CC, Church DM, Clarke L, Farrell A, Flores J, Galeev T,  
1089 Gorkin DU, Gujral M, Guryev V, Heaton WH, Korlach J, Kumar S, Kwon JY, Lam ET, Lee  
1090 JE, Lee J, Lee W-P, Lee SP, Li S, Marks P, Viaud-Martinez K, Meiers S, Munson KM,  
1091 Navarro FCP, Nelson BJ, Nodzak C, Noor A, Kyriazopoulou-Panagiotopoulou S, Pang  
1092 AWC, Qiu Y, Rosanio G, Ryan M, Stütz A, Spierings DCJ, Ward A, Welch AE, Xiao M,

1093 Xu W, Zhang C, Zhu Q, Zheng-Bradley X, Lowy E, Yakneen S, McCarroll S, Jun G, Ding  
1094 L, Koh CL, Ren B, Flicek P, Chen K, Gerstein MB, Kwok P-Y, Lansdorp PM, Marth GT,  
1095 Sebat J, Shi X, Bashir A, Ye K, Devine SE, Talkowski ME, Mills RE, Marschall T, Korbel  
1096 JO, Eichler EE, Lee C. 2019. Multi-platform discovery of haplotype-resolved structural  
1097 variation in human genomes. *Nat Commun* 10:1784.

1098 41. Scally A, Durbin R. 2012. Revising the human mutation rate: implications for  
1099 understanding human evolution. *Nat Rev Genet*. England.

1100 42. Hughes JF, Coffin JM. 2005. Human endogenous retroviral elements as indicators of  
1101 ectopic recombination events in the primate genome. *Genetics* 171:1183–1194.

1102 43. Volleth M, Zenker M, Joksic I, Liehr T. 2020. Long-term Culture of EBV-induced Human  
1103 Lymphoblastoid Cell Lines Reveals Chromosomal Instability. *J Histochem Cytochem Off*  
1104 *J Histochem Soc* 68:239–251.

1105 44. Nanbo A, Inoue K, Adachi-Takasawa K, Takada K. 2002. Epstein-Barr virus RNA confers  
1106 resistance to interferon-alpha-induced apoptosis in Burkitt's lymphoma. *EMBO J* 21:954–  
1107 965.

1108 45. Furuta R, Yasunaga J-I, Miura M, Sugata K, Saito A, Akari H, Ueno T, Takenouchi N,  
1109 Fujisawa J-I, Koh K-R, Higuchi Y, Mahgoub M, Shimizu M, Matsuda F, Melamed A,  
1110 Bangham CR, Matsuoka M. 2017. Human T-cell leukemia virus type 1 infects multiple  
1111 lineage hematopoietic cells in vivo. *PLoS Pathog* 13:e1006722.

1112 46. Mahé D, Matusali G, Deleage C, Alvarenga RLLS, Satie A-P, Pagliuzza A, Mathieu R,  
1113 Lavoué S, Jégou B, de França LR, Chomont N, Houzet L, Rolland AD, Dejucq-Rainsford  
1114 N. 2020. Potential for virus endogenization in humans through testicular germ cell  
1115 infection: the case of HIV. *bioRxiv* 2020.06.04.135657.

1116 47. Stoye JP. 2006. Koala retrovirus: a genome invasion in real time. *Genome Biol* 7:241.

1117 48. Gaccioli F, Lager S, de Goffau MC, Sovio U, Dopierala J, Gong S, Cook E, Sharkey A,  
1118 Moffett A, Lee WK, Delles C, Venturini C, Breuer J, Parkhill J, Peacock SJ, Charnock-  
1119 Jones DS, Smith GCS. 2020. Fetal inheritance of chromosomally integrated human  
1120 herpesvirus 6 predisposes the mother to pre-eclampsia. *Nat Microbiol*.

1121 49. Gravel A, Dubuc I, Morissette G, Sedlak RH, Jerome KR, Flamand L. 2015. Inherited  
1122 chromosomally integrated human herpesvirus 6 as a predisposing risk factor for the  
1123 development of angina pectoris. *Proc Natl Acad Sci* 112:8058 LP – 8063.

1124 50. Zhou W, Emery SB, Flasch DA, Wang Y, Kwan KY, Kidd JM, Moran J V, Mills RE. 2020.  
1125 Identification and characterization of occult human-specific LINE-1 insertions using long-  
1126 read sequencing technology. *Nucleic Acids Res* 48:1146–1163.

1127 51. Ewing AD, Smits N, Sanchez-Luque FJ, Faivre J, Brennan PM, Richardson SR,  
1128 Cheetham SW, Faulkner GJ. 2020. Nanopore Sequencing Enables Comprehensive  
1129 Transposable Element Epigenomic Profiling. *Mol Cell*.

1130 52. Jha AR, Pillai SK, York VA, Sharp ER, Storm EC, Wachter DJ, Martin JN, Deeks SG,  
1131 Rosenberg MG, Nixon DF, Garrison KE. 2009. Cross-sectional dating of novel haplotypes  
1132 of HERV-K 113 and HERV-K 115 indicate these proviruses originated in Africa before  
1133 *Homo sapiens*. *Mol Biol Evol* 26:2617–2626.

1134 53. Turner G, Barbulescu M, Su M, Jensen-Seaman MI, Kidd KK, Lenz J. 2001. Insertional  
1135 polymorphisms of full-length endogenous retroviruses in humans. *Curr Biol* 11:1531–  
1136 1535.

1137 54. Dewannieux M, Harper F, Richaud A, Letzelter C, Ribet D, Pierron G, Heidmann T. 2006.  
1138 Identification of an infectious progenitor for the multiple-copy HERV-K human  
1139 endogenous retroelements. *Genome Res* 16:1548–1556.

1140 55. Green ED, Gunter C, Biesecker LG, Di Francesco V, Easter CL, Feingold EA, Felsenfeld  
1141 AL, Kaufman DJ, Ostrander EA, Pavan WJ, Phillippy AM, Wise AL, Dayal JG, Kish BJ,  
1142 Mandich A, Wellington CR, Wetterstrand KA, Bates SA, Leja D, Vasquez S, Gahl WA,  
1143 Graham BJ, Kastner DL, Liu P, Rodriguez LL, Solomon BD, Bonham VL, Brody LC,

1144 Hutter CM, Manolio TA. 2020. Strategic vision for improving human health at The  
1145 Forefront of Genomics. *Nature* 586:683–692.  
1146 56. Kumata R, Ito J, Takahashi K, Suzuki T, Sato K. 2020. A tissue level atlas of the healthy  
1147 human virome. *BMC Biol* 18:55.  
1148  
1149

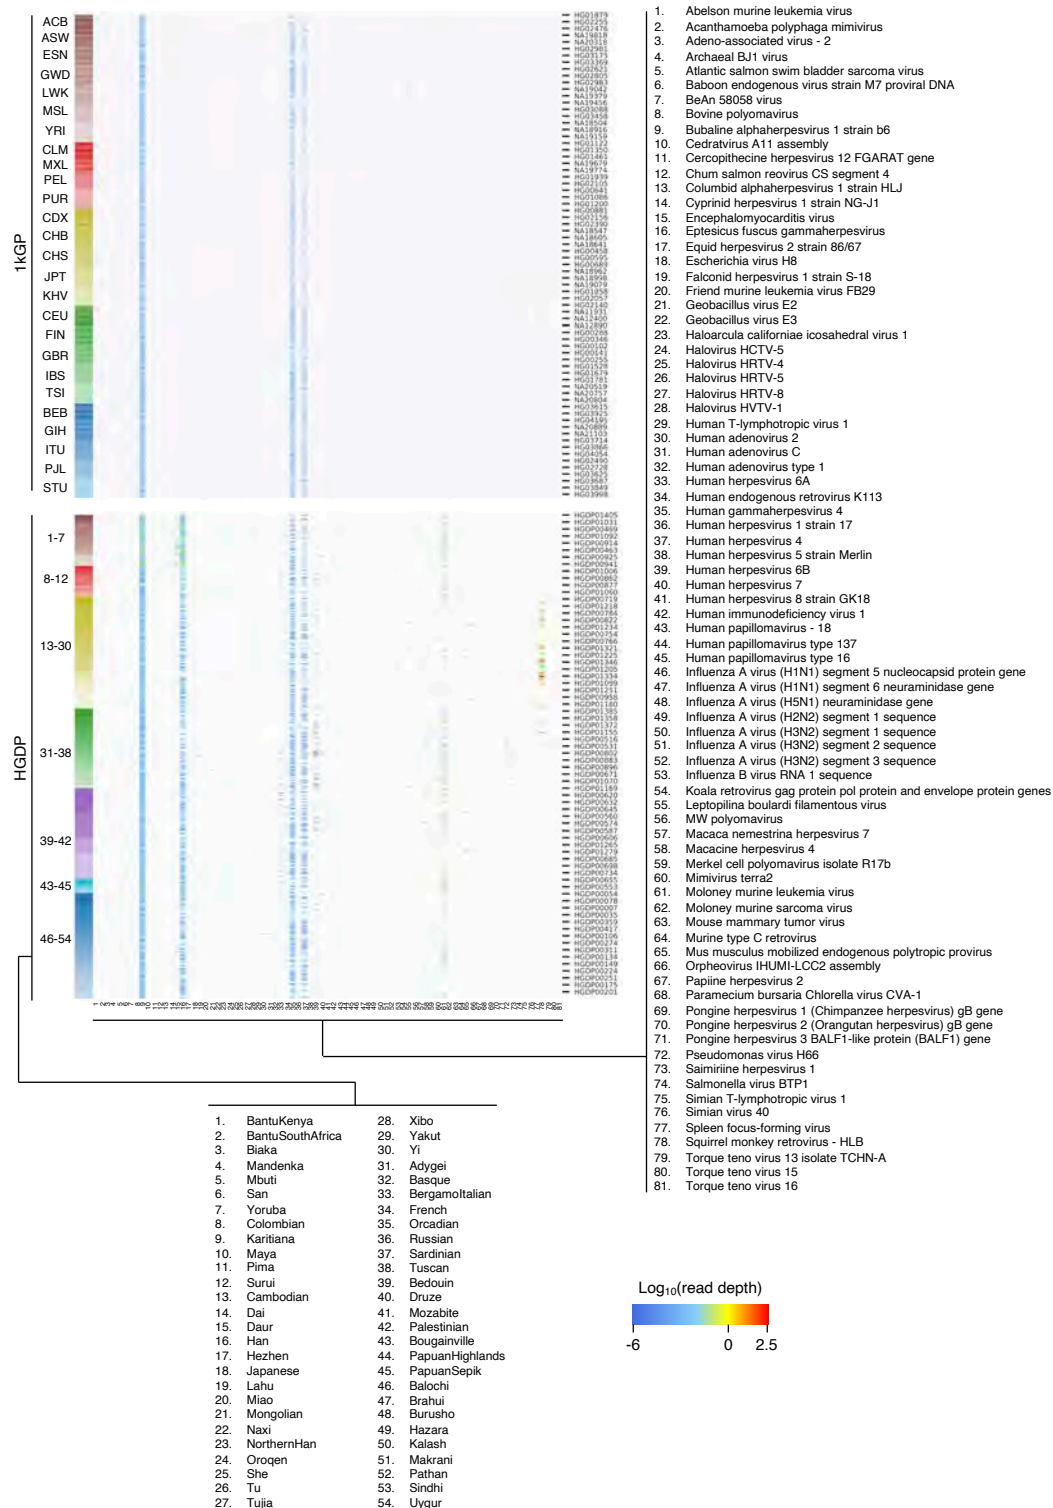

1150  
1151  
1152  
1153  
1154  
1155

**Supplementary Figure 1** Virus search from 1kGP and HGDP WGS

Heatmap shows the read depth of viruses with at least one read in at least one dataset from 2,504 1kGP as well as 808 HDGP datasets.

**A**Simian T-lymphotropic virus 1(+)  
samples in 1kGP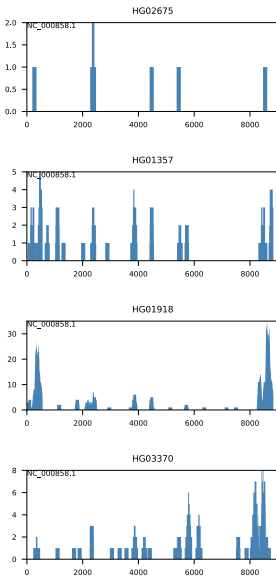**B** HTLV-1(+) samples in 1kGP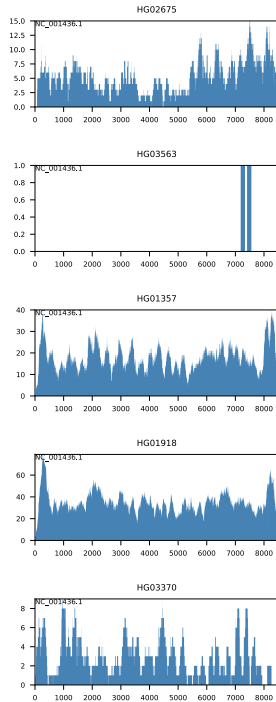**C**Human immunodeficiency virus 1(+)  
samples in HGDP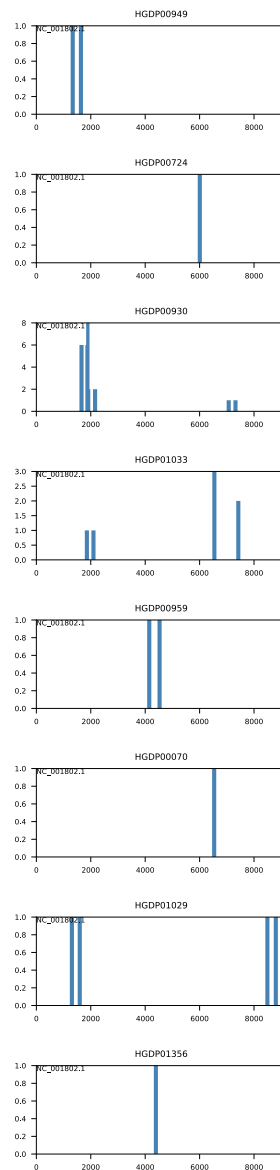**D**Chum salmon reovirus CS segment 4 (+)  
samples in HGDP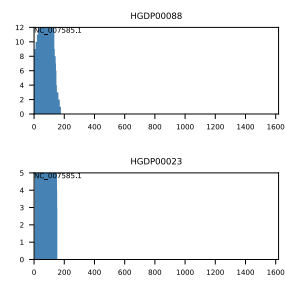

1156  
1157  
1158  
1159  
1160  
1161  
1162

**Supplementary Figure 2** Read depth of STLV-1, HIV-1, and chum salmon reovirus  
Depth of reads mapping to STLV-1 (A), HTLV-1 (B), HIV-1 (C), and chum salmon reovirus (D)  
are shown. X-axis and Y-axis show the genome position of indicated virus and the depth of  
reads mapping to the indicated virus, respectively. The name of each dataset is shown at the  
top of the panel.



**A** 1kGP, SMRV(+) samples

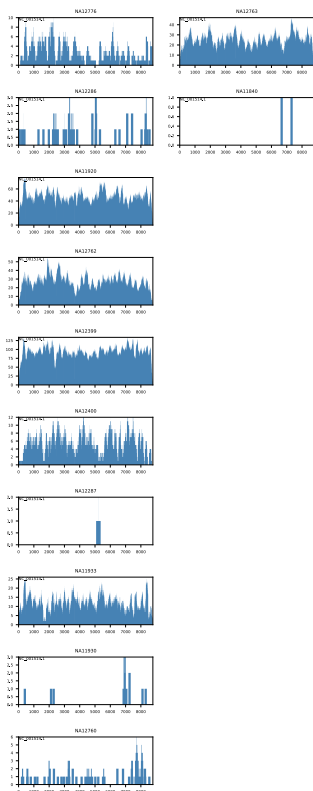

**B** HGDP, SMRV(+) samples

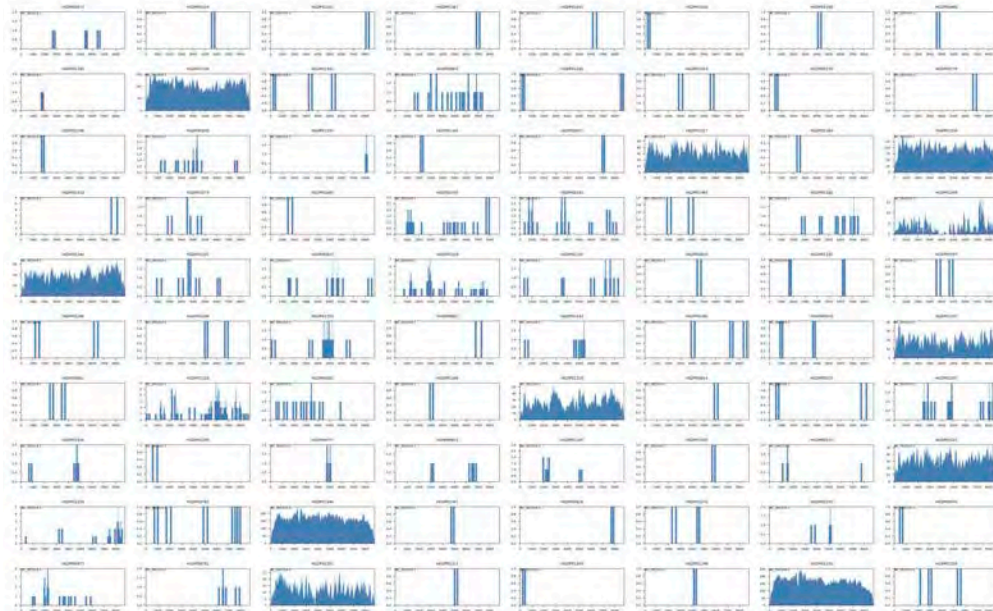

1163  
1164  
1165  
1166  
1167  
1168

**Supplementary Figure 3** Read depth of SMRV and HTLV-1

Depth of reads from 1kGP (A) and HGDP (B) datasets mapping to SMRV-H are shown. X-axis and Y-axis show the genome position of indicated virus and the depth of reads mapping to the indicated virus, respectively. The name of each dataset is shown at the top of the panel.

**A**

1kGP SMRV hybrid reads

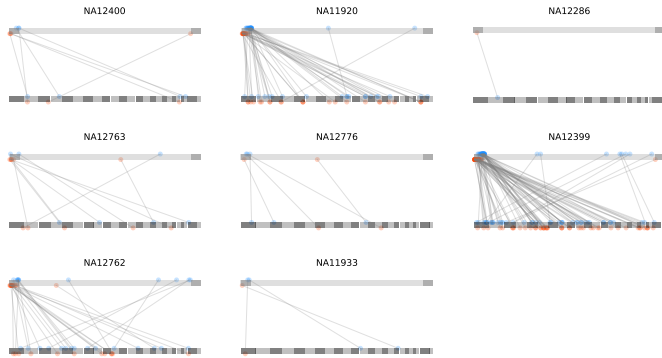**B**

1kGP HTLV-1 hybrid reads

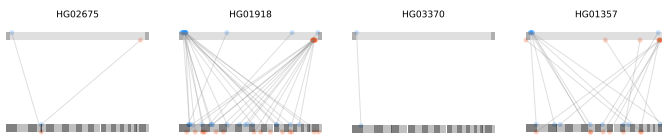**C**

HGDP SMRV hybrid reads

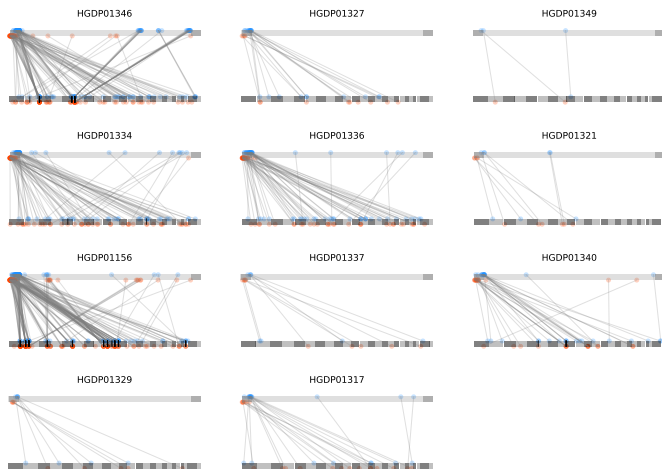

1169

1170

1171

1172

1173

1174

1175

1176

1177

1178

1179

**Supplementary Figure 4** Virus-chromosome hybrid reads

WGS read pairs which are mapped to both the virus genome and the human genome are shown. Gray bar in the top of each panel shows the SMRV-H (A), HTLV-1 (B), and SMRV-H (C). LTR are shown as dark gray rectangles. Gray bars in the bottom of each panel show the chromosome 1 to 22, X, and Y (from left to right). Read-1 and Read-2 of a read-pair are connected with a line. Reads mapping to forward and reverse directions are shown as blue and red dots, respectively. The reads mapping to left LTR was kept when a read was multi-mapped to both left and right LTR. The genome position of reads mapping only to right LTR were replaced to the left LTR. The name of each dataset is shown at the top of the panel.

**A**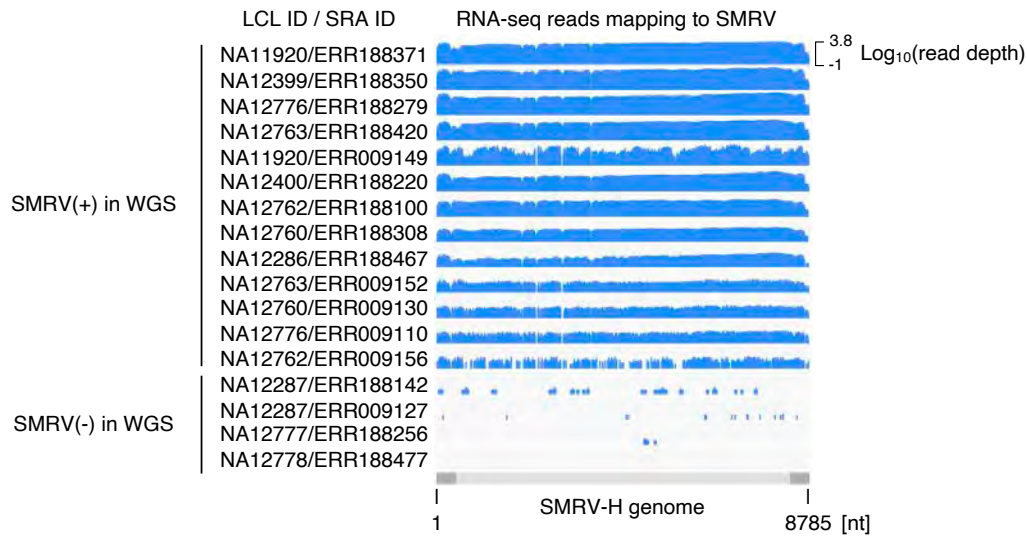**B**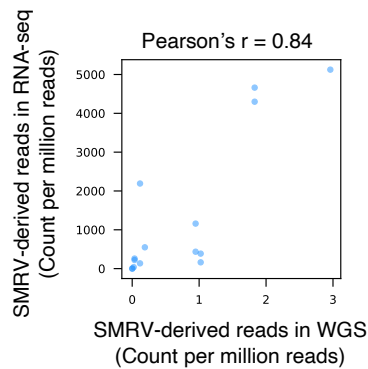**C**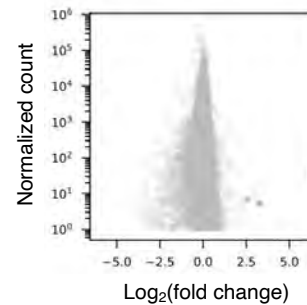

1180

1181

**Supplementary Figure 5** Differential gene analysis between SMRV-positive and -negative samples

1182

A. Depth of RNA-seq reads mapping to SMRV-H. Geuvadis RNA-seq datasets were used for

1184 the analysis. All datasets are shown with the same scale of the Y-axis.

1185 B. Correlation of the abundance of reads mapping to SMRV between WGS and RNA-seq. LCLs

1186 producing both WGS and RNA-seq were used for this analysis.

1187 C. MA plot showing the differences of gene expression and the normalized read counts. Two

1188 genes with differential expression are shown as blue dots.

1189

1kGP, HHV-6(+) samples

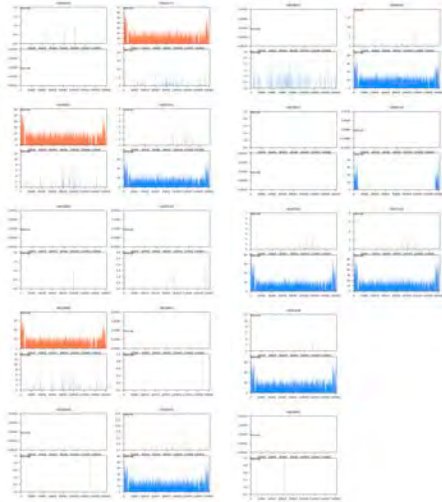

HGDP, HHV-6(+) samples

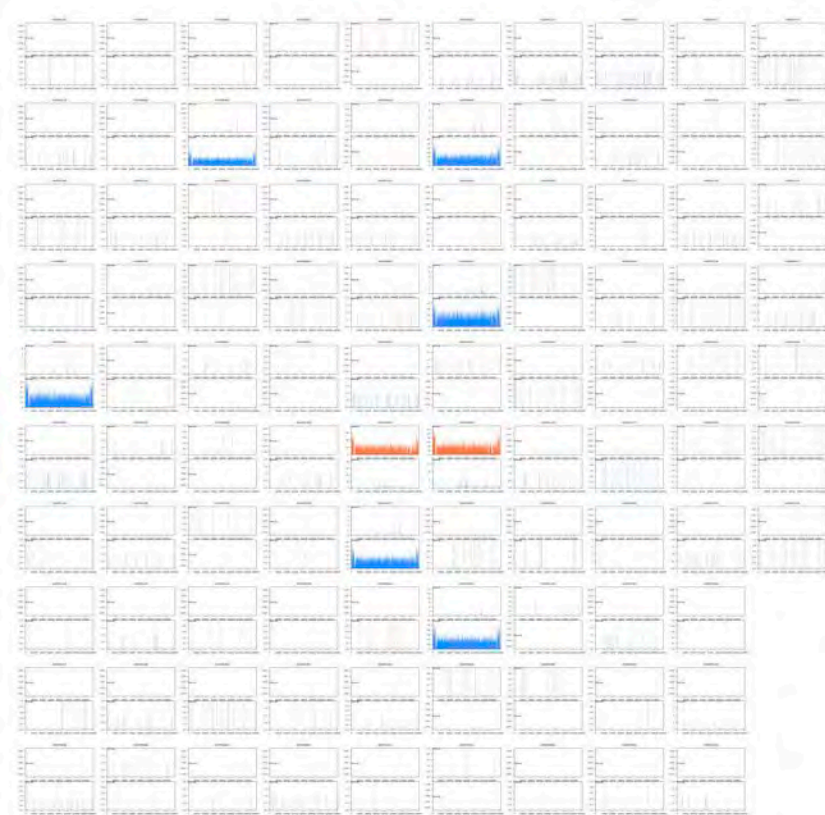

1190  
1191  
1192  
1193  
1194  
1195  
1196

**Supplementary Figure 6** Read depth of HHV-6A and HHV-6B  
Depth of reads mapping to HHV-6A and HHV-6B are shown. Read depth of HHV-6A and HHV-6B are shown as orange and blue coverage plots, respectively. X-axis and Y-axis show the genome position of indicated virus and the depth of reads mapping to the indicated virus, respectively. The name of each dataset is shown at the top of the panel.

**A**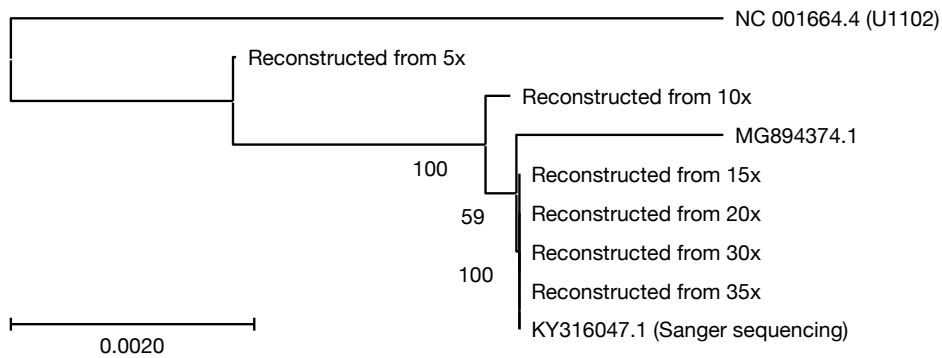**B**

| WGS depth | Reconstructed length (nt) | Reconstructed length (percent to U1102) |
|-----------|---------------------------|-----------------------------------------|
| 5x        | 141,178                   | 88.5806071                              |
| 10x       | 152,679                   | 95.796785                               |
| 15x       | 153,468                   | 96.2918345                              |
| 20x       | 154,062                   | 96.6645334                              |
| 30x       | 154,634                   | 97.0234286                              |
| 35x       | 154,238                   | 96.7749627                              |
| -----     |                           |                                         |
| U1102     | 159,378                   | 100                                     |

1197  
 1198  
 1199  
 1200  
 1201  
 1202  
 1203  
 1204

**Supplementary Figure 7** Accuracy of endogenous HHV-6 sequence reconstruction  
 A. Phylogenetic analysis of reconstructed HHV-6A sequences. HHV-6A in NA18999 reconstructed from 35x, 30x, 20x, 15x, 10x, and 5x autosome depths are aligned with the reference HHV-6A (U1102) as well as the published sequences of HHV-6A Sanger sequenced using NA18999 DNA (KY316047.1) or reconstructed from a WGS of NA18999 (MG894374.1).  
 B. The lengths of endogenous HHV-6A reconstructed from various WGS read depths.

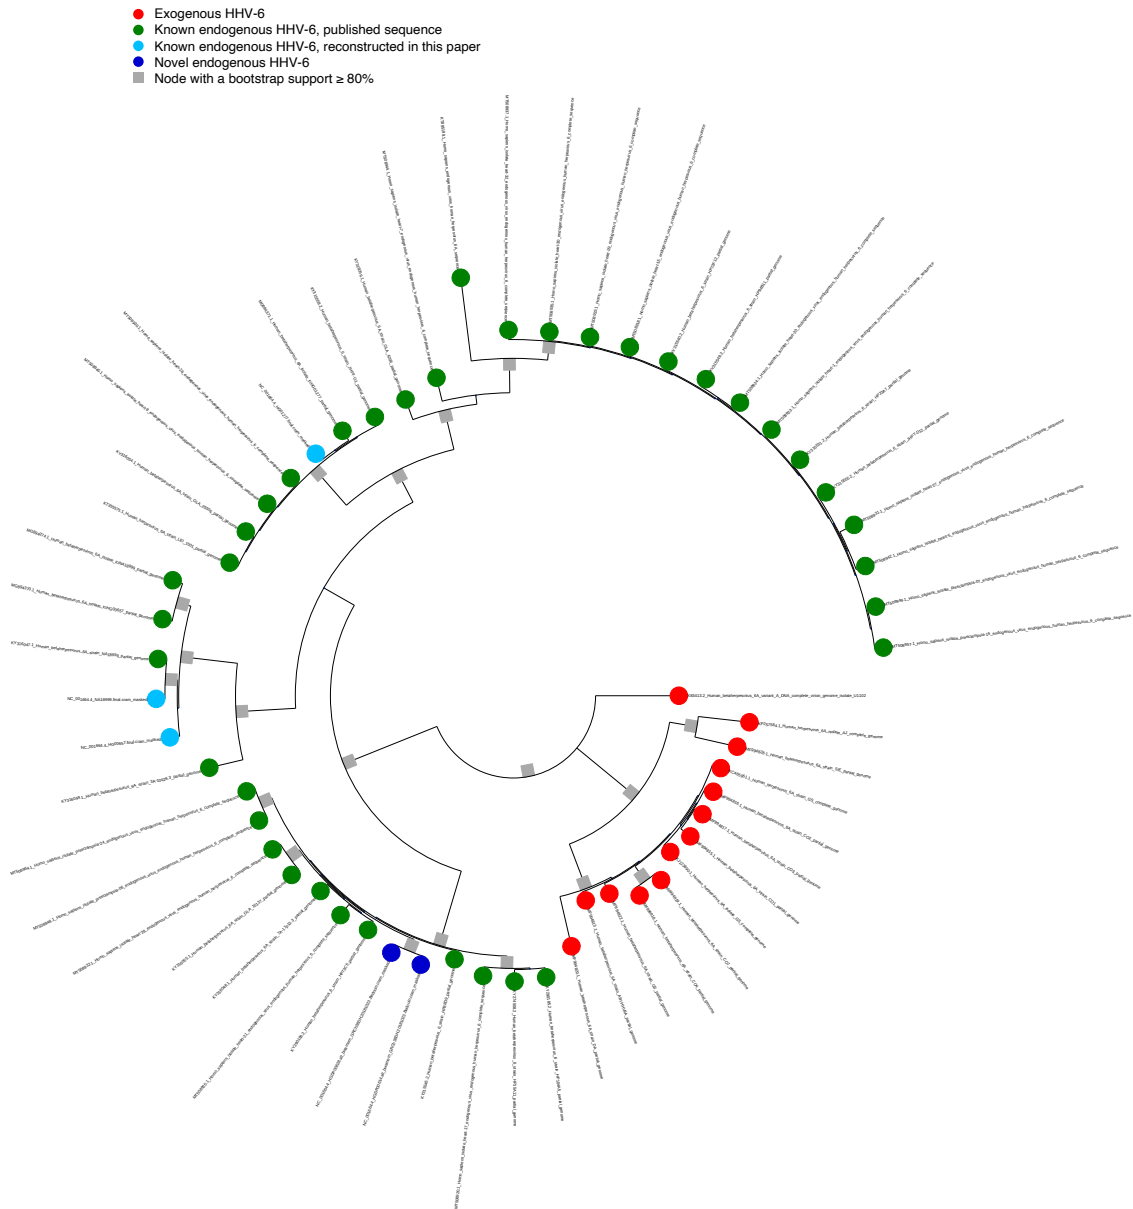

1205  
 1206  
 1207  
 1208  
 1209  
 1210  
 1211

**Supplementary Figure 8** Phylogenetic tree of HHV-6A U with leaf names  
 Phylogenetic trees inferred from U regions of HHV-6A. The publicly available sequences of endogenous and exogenous HHV-6A as well as ones reconstructed in the present study were used. The tree shown here is the same tree as Figure 3B left panel, except for showing the leaf names.

- Exogenous HHV-6
- Known endogenous HHV-6, published sequence
- Known endogenous HHV-6, reconstructed in this paper
- Novel endogenous HHV-6
- Node with a bootstrap support  $\geq 80\%$

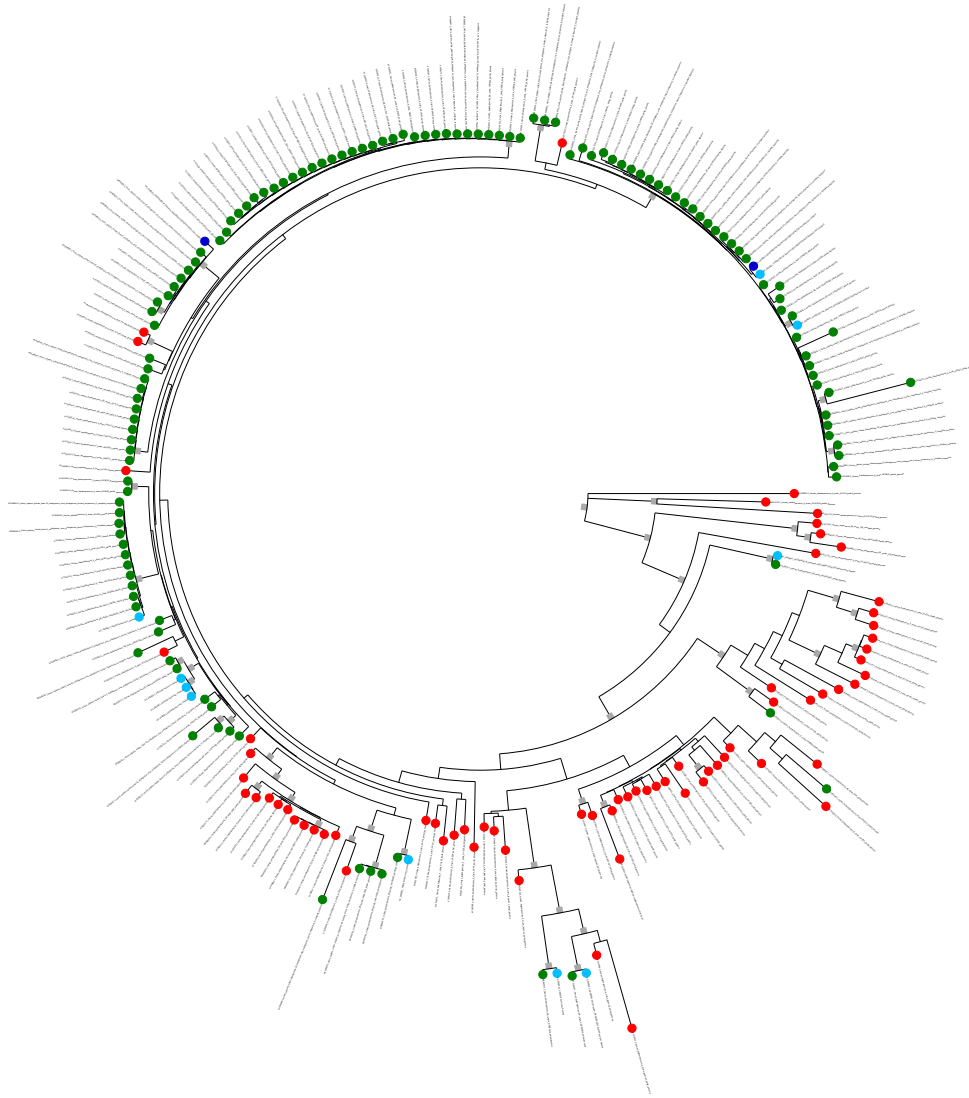

1212

1213

**Supplementary Figure 9** Phylogenetic tree of HHV-6B U with leaf names

1214

Phylogenetic trees inferred from U regions of HHV-6B. The publicly available sequences of endogenous and exogenous HHV-6B as well as ones reconstructed in the present study were used. The tree shown here is the same tree as Figure 3B right panel, except for showing the leaf names.

1217

1218

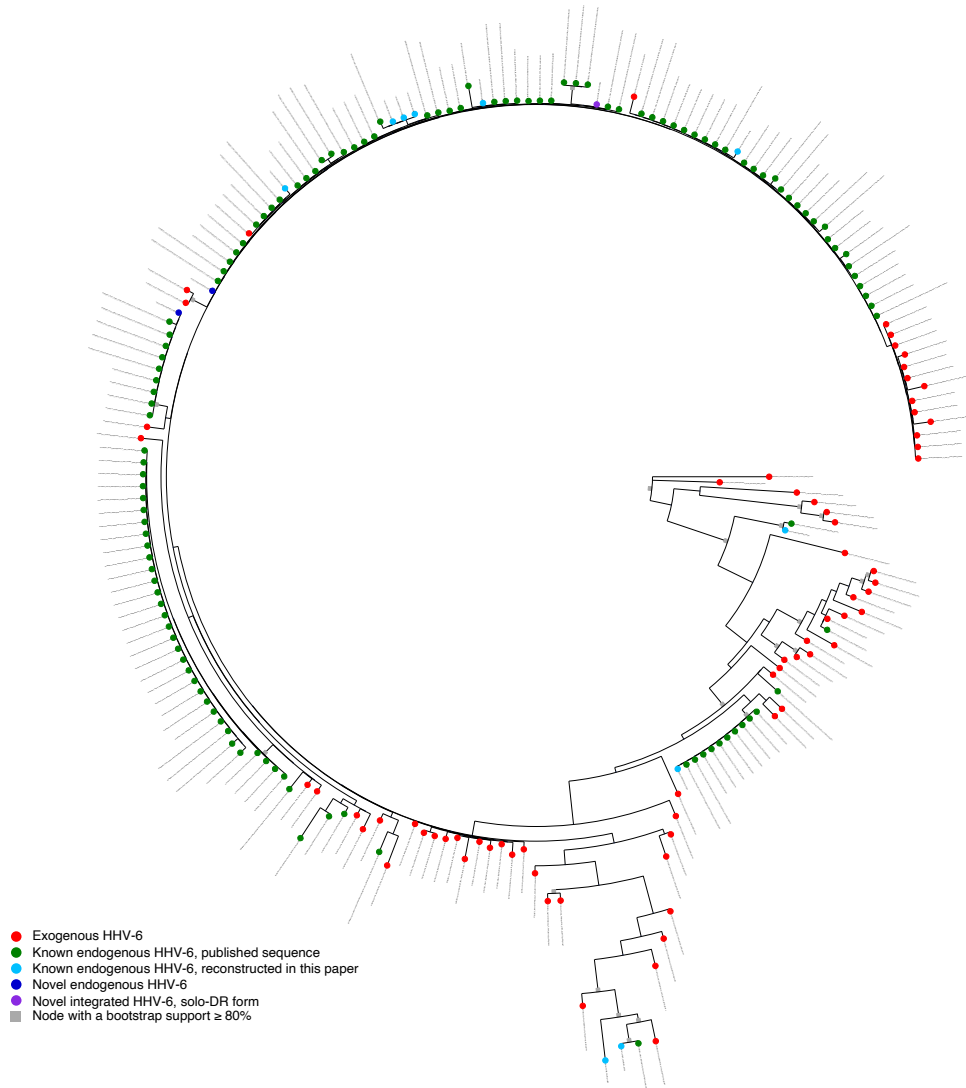

1219  
1220  
1221  
1222  
1223  
1224

**Supplementary Figure 10** Phylogenetic tree of HHV-6B DR with leaf names

Phylogenetic trees inferred from DR regions of HHV-6B. The publicly available sequences of endogenous and exogenous HHV-6B as well as ones reconstructed in the present study were used. The tree shown here is the same tree as Figure 3C, except for showing the leaf names.



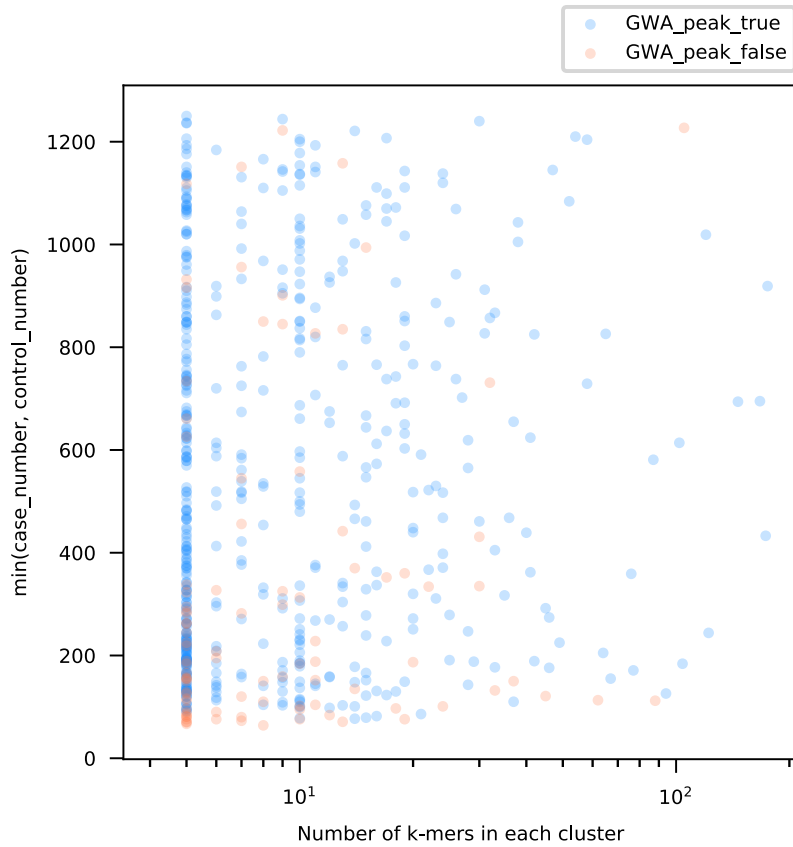

1225  
 1226 **Supplementary Figure 11** Numbers of *k*-mers in *k*-mer clusters  
 1227 Scatter plot shows the 597 *k*-mer clusters as dots. X-axis shows the number of *k*-mers in *k*-mer  
 1228 clusters. Y-axis shows the number of either case or control used for GWA analysis, whichever is  
 1229 smaller. Blue dots represent *k*-mer clusters with SNVs with association, while red dots show  
 1230 ones without any association to SNVs.  
 1231

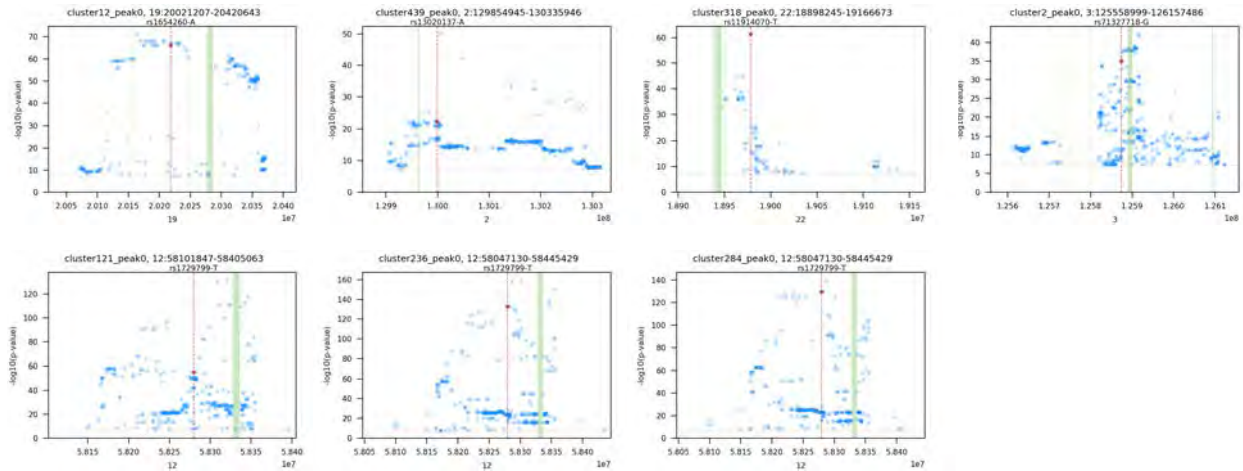

1232  
 1233  
 1234  
 1235  
 1236  
 1237  
 1238  
 1239

**Supplementary Figure 12** SNVs in the NHGRI-EBI GWAS catalog overlapping with the HERV-K *k*-mer LD regions  
 Manhattan plots showing SNVs in the GWAS catalog overlapping with the indicated *k*-mer clusters. SNVs with p-value lower than 5e-08 are shown. Green lines show the reference HERV-K provirus. Red dots show the lead SNVs listed in the NHGRI-EBI GWAS catalog.

A

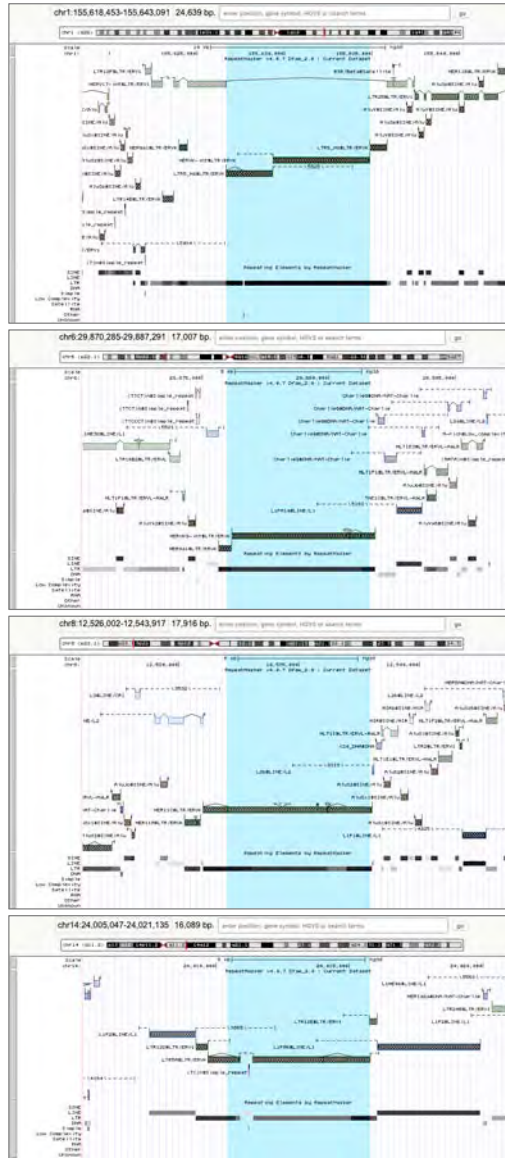

↔  
Absent in at least one sample.

B

| Deletion in Audano et al. | Sample(s) with deletion in Audano et al. | Samples lacking k-mers  | K-mer cluster(s)      |
|---------------------------|------------------------------------------|-------------------------|-----------------------|
| chr1:155626666-155634878  | NA19434                                  | NA19434                 | cluster76             |
| chr6:29875954-29881622    | HG00268;NA12878;NA19434                  | HG00268;NA12878;NA19434 | cluster520            |
| chr8:12531974-12537945    | NA19434                                  | NA19434                 | cluster191;cluster336 |
| chr14:24010410-24015772   | NA12878;NA19434                          | NA12878;NA19434         | cluster368            |

1240  
1241  
1242  
1243  
1244  
1245  
1246

**Supplementary Figure 13** Provirus/solo-LTR-type HERV-K polymorphism captured by LDfred  
 A. UCSC genome browser view showing Four polymorphic HERV-K. Blue regions are detected as sequence deletions in Audano et al.  
 B. Cross-reference between deletions exist within HERV-K detected in Audano et al. and *k*-mer clusters detected by LDfred.

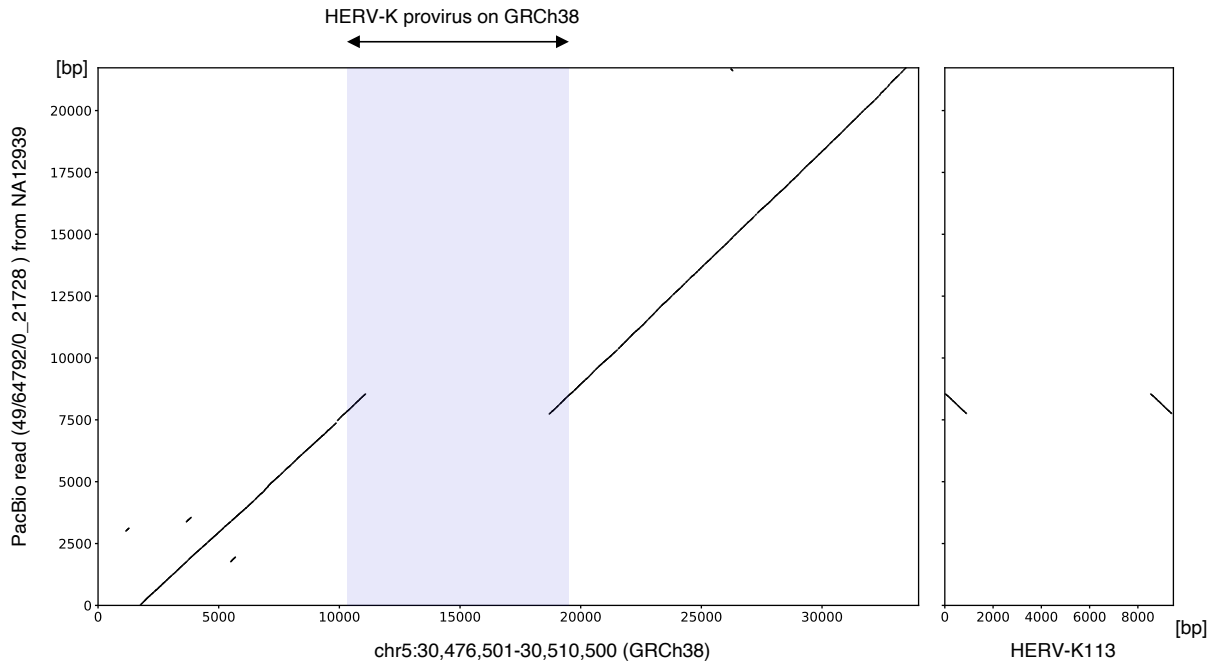

1247  
 1248  
 1249  
 1250  
 1251  
 1252  
 1253

**Supplementary Figure 14** Provirus/solo-LTR-type HERV-K polymorphism captured by LDfred  
 A PacBio read showing the absence of a HERV-K on chromosome 5 in NA12939. Left dot matrix shows the alignment between the partial sequence of chromosome 5 and PacBio read from NA12939 sequenced in Chaisson et al. Right dot matrix shows the alignment between HERV-K113 and the PacBio read. Blue region shows the provirus on chromosome 5.

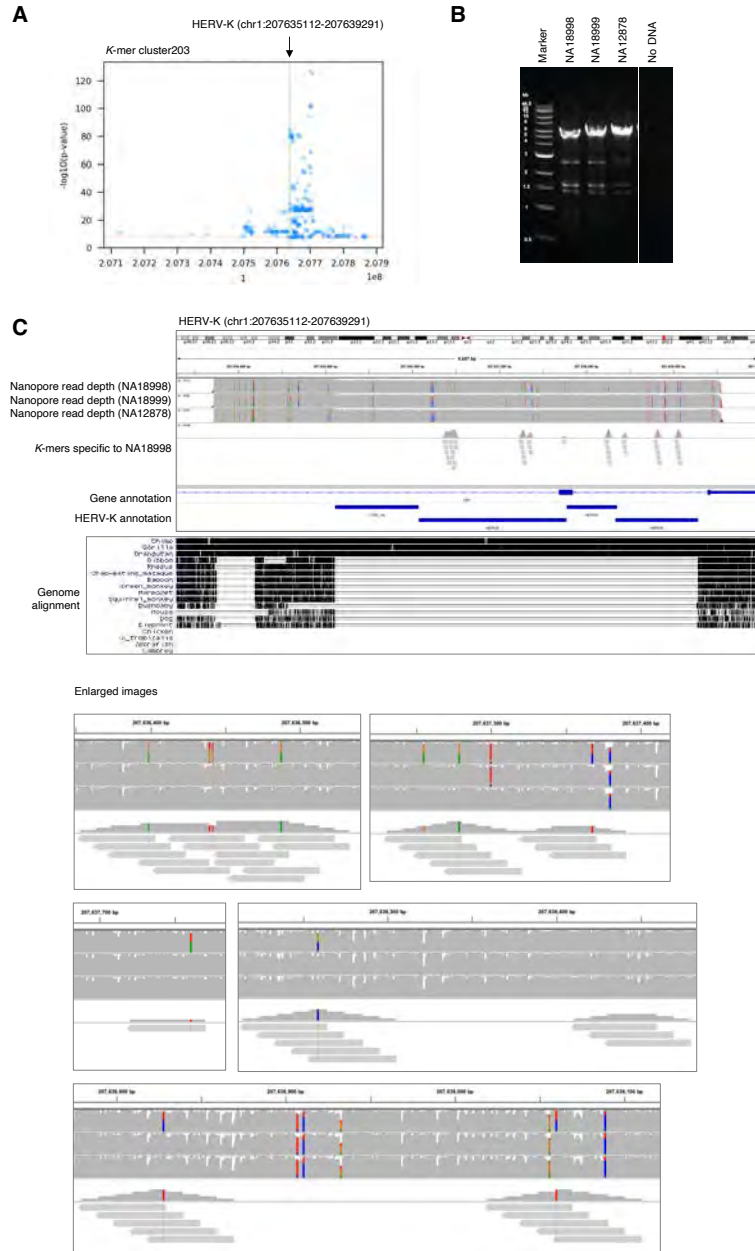

1254  
 1255  
 1256  
 1257  
 1258  
 1259  
 1260  
 1261  
 1262  
 1263  
 1264  
 1265  
 1266

**Supplementary Figure 15** HERV-K SNVs captured by LDfred

A. Manhattan plot showing SNVs associating the *k*-mer cluster203. SNVs with p-value lower than  $5e-08$  are shown. Green line shows the reference HERV-K provirus.

B. Amplification of the HERV-K provirus by PCR. HERV-K provirus with adjacent sequence was amplified and PCR products were separated by gel electrophoresis. DNA extracted from LCLs originating from NA18998, NA18999, and NA12878 were used as templates.

C. Upper panel: IGV view of long-read sequencing reads mapping to HERV-K. The PCR amplicons were sequenced using an Oxford Nanopore flongle flow cell and mapped to GRCh38. *k*-mers in *k*-mer detecting the HERV-K were also mapped to the PCR target regions. Lower panel: UCSC genome browser view showing the Multiz Alignment of 100 Vertebrates track.

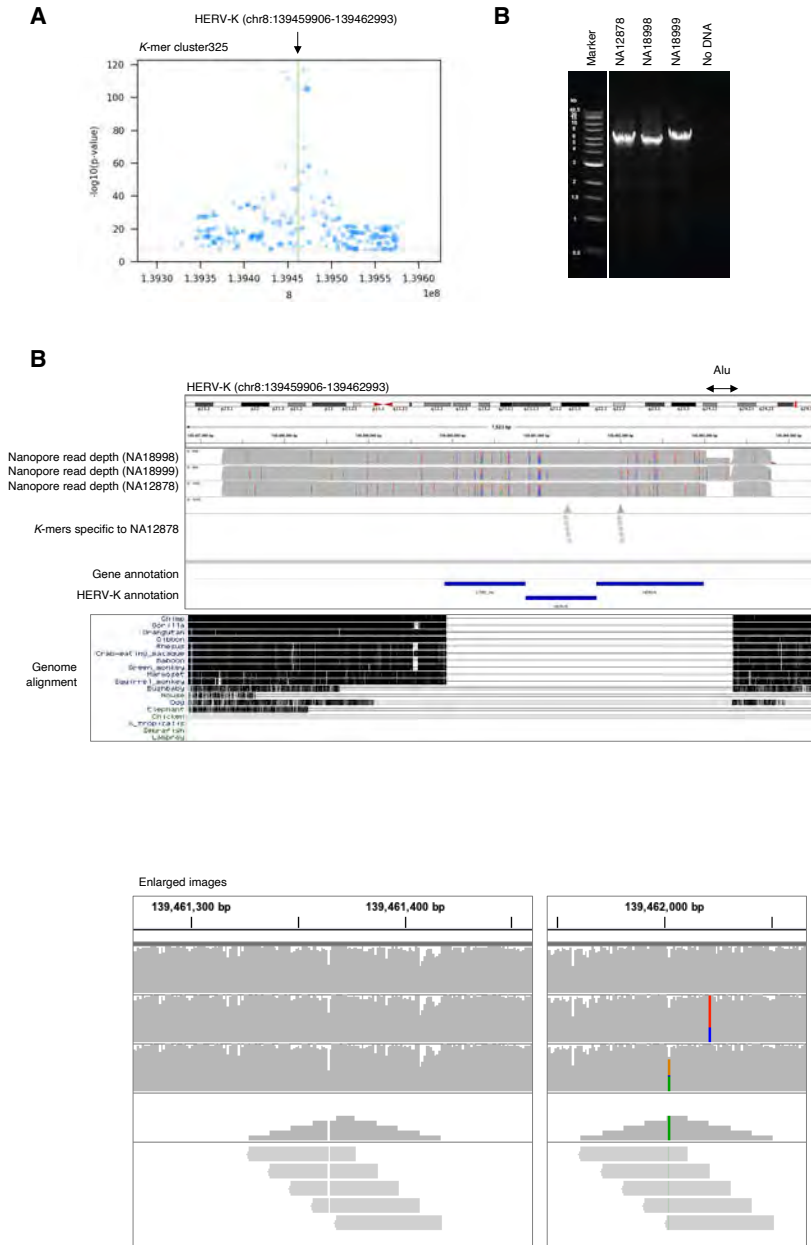

1267  
1268  
1269  
1270  
1271  
1272  
1273  
1274  
1275  
1276  
1277  
1278  
1279

**Supplementary Figure 16** HERV-K SNVs captured by LDfred

A. Manhattan plot showing SNVs associating the *k*-mer cluster325. SNVs with p-value lower than  $5e-8$  are shown. Green line shows the reference HERV-K provirus.

B. Amplification of the HERV-K provirus by PCR. HERV-K provirus with adjacent sequence was amplified and PCR products were separated by gel electrophoresis. DNA extracted from LCLs originating from NA18998, NA18999, and NA12878 were used as templates.

C. Upper panel: IGV view of long-read sequencing reads mapping to HERV-K. The PCR amplicons were sequenced using an Oxford Nanopore flongle flow cell and mapped to GRCh38. *k*-mers in *k*-mer detecting the HERV-K were also mapped to the PCR target regions. Lower panel: UCSC genome browser view showing the Multiz Alignment of 100 Vertebrates track.
